# Supplementary material
Source: PubMed Central journal article supplement (PMC7869491)
Supplement: NIHMS1660178-supplement-Supplement.pdf [file NIHMS1660178-supplement-Supplement.pdf]

In the format provided by the authors and unedited.

# Global hunger and climate change adaptation through international trade

Charlotte Janssens <sup>1,2</sup>✉, Petr Havlík<sup>2</sup>, Tamás Krisztin<sup>2</sup>, Justin Baker <sup>3</sup>, Stefan Frank<sup>2</sup>, Tomoko Hasegawa <sup>2,4</sup>, David Leclère <sup>2</sup>, Sara Ohrel <sup>5</sup>, Shaun Ragnauth <sup>5</sup>, Erwin Schmid <sup>6</sup>, Hugo Valin <sup>2</sup>, Nicole Van Lipzig<sup>1</sup> and Miet Maertens <sup>1</sup>

---

<sup>1</sup>Department of Earth and Environmental Sciences, University of Leuven (KU Leuven), Heverlee, Belgium. <sup>2</sup>Ecosystems Services and Management Program, International Institute for Applied System Analysis (IIASA), Laxenburg, Austria. <sup>3</sup>RTI International, Durham, NC, USA. <sup>4</sup>College of Science and Engineering, Ritsumeikan University, Kusatsu, Japan. <sup>5</sup>United States Environmental Protection Agency, Washington, DC, USA. <sup>6</sup>Department of Economics and Social Sciences, University of Natural Resources and Life Sciences, Vienna, Austria. ✉e-mail: [charlotte.janssens@kuleuven.be](mailto:charlotte.janssens@kuleuven.be)

## Supplementary Information

### Global hunger and climate change adaptation through international trade

Janssens Charlotte<sup>1,2\*</sup>, Havlík Petr<sup>2</sup>, Krisztin Tamás<sup>2</sup>, Baker Justin<sup>3</sup>, Frank Stefan<sup>2</sup>, Hasegawa Tomoko<sup>2,4</sup>, Leclère David<sup>2</sup>, Ohrel Sara<sup>5</sup>, Ragnauth Shaun<sup>5</sup>, Schmid Erwin<sup>6</sup>, Valin Hugo<sup>2</sup>, Van Lipzig Nicole<sup>1</sup>, Maertens Miet<sup>1</sup>

<sup>1</sup> University of Leuven (KU Leuven), Department of Earth and Environmental Sciences, Celestijnenlaan 200E, Heverlee, Belgium

<sup>2</sup> International Institute for Applied System Analysis (IIASA), Schlossplatz 1, A-2361 Laxenburg, Austria

<sup>3</sup> RTI International, 3040 East Cornwallis Road, Durham, NC 27709-2194, United States of America

<sup>4</sup> Ritsumeikan University, 1-1-1, Nojihigashi, Kusatsu, Shiga, 525-8577, Japan

<sup>5</sup> United States Environmental Protection Agency, 1200 Pennsylvania Avenue N.W., Washington, DC, 20460, United States of America

<sup>6</sup> Department of Economics and Social Sciences, University of Natural Resources and Life Sciences. Feistmantelstrasse 4, 1180 Vienna, Austria

\* corresponding author: [charlotte.janssens@kuleuven.be](mailto:charlotte.janssens@kuleuven.be)

## Contents

|                                                          |    |
|----------------------------------------------------------|----|
| Supplementary Figures .....                              | 2  |
| Supplementary Tables .....                               | 4  |
| Supplementary Text.....                                  | 22 |
| Contribution to existing literature .....                | 22 |
| Comparative advantage analysis .....                     | 25 |
| CO <sub>2</sub> fertilization sensitivity analysis ..... | 30 |
| Supplementary References.....                            | 36 |

## Supplementary Figures

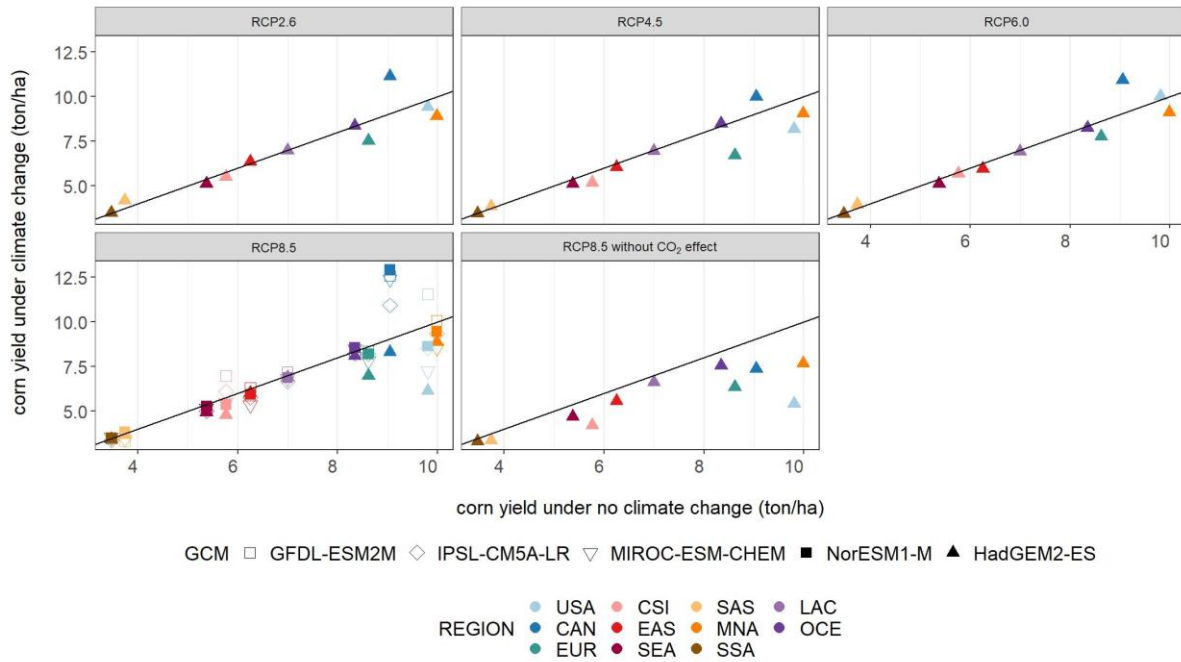

**Supplementary Fig. 1 | Corn yield under climate change and under no climate change in each region by 2050 projected by the EPIC crop model.** Yields in ton dry matter per ha. Under no climate change yields are determined by base year yields and assumptions on technological development over time, under climate change an additional climate impact shifter is applied.

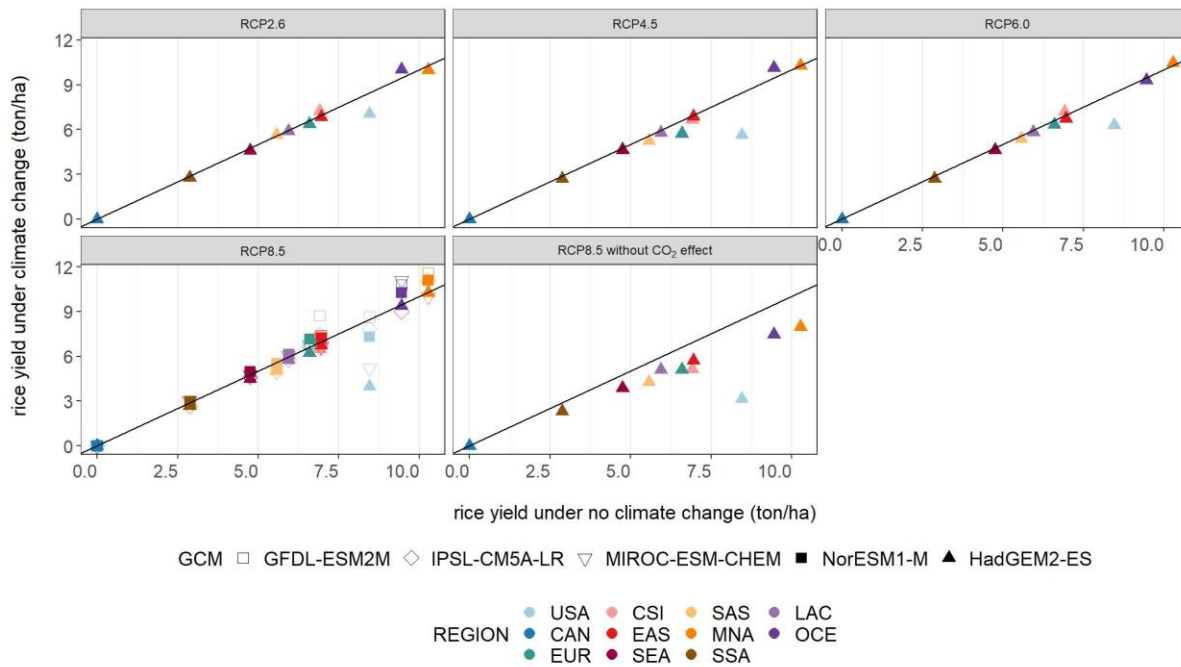

**Supplementary Fig. 2 | Rice yield under climate change and no climate change in each region by 2050 projected by the EPIC crop model.** Yields in ton dry matter per ha. Under no climate change yields are determined by base year yield and assumptions on technological development over time, under climate change an additional climate impact shifter is applied.

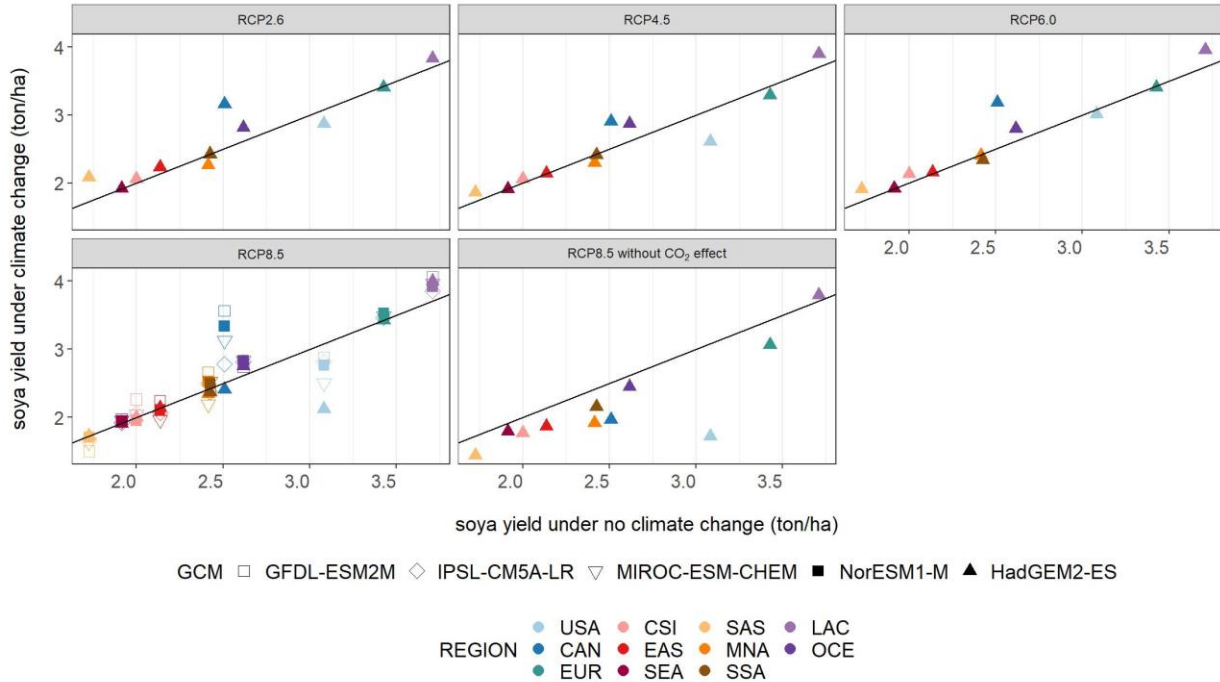

**Supplementary Fig. 3 | Soya yield under climate change and no climate change in each region by 2050 projected by the EPIC crop model.** Yields in ton dry matter per ha. Under no climate change yields are determined by base year yield and assumptions on technological development over time, under climate change an additional climate impact shifter is applied.

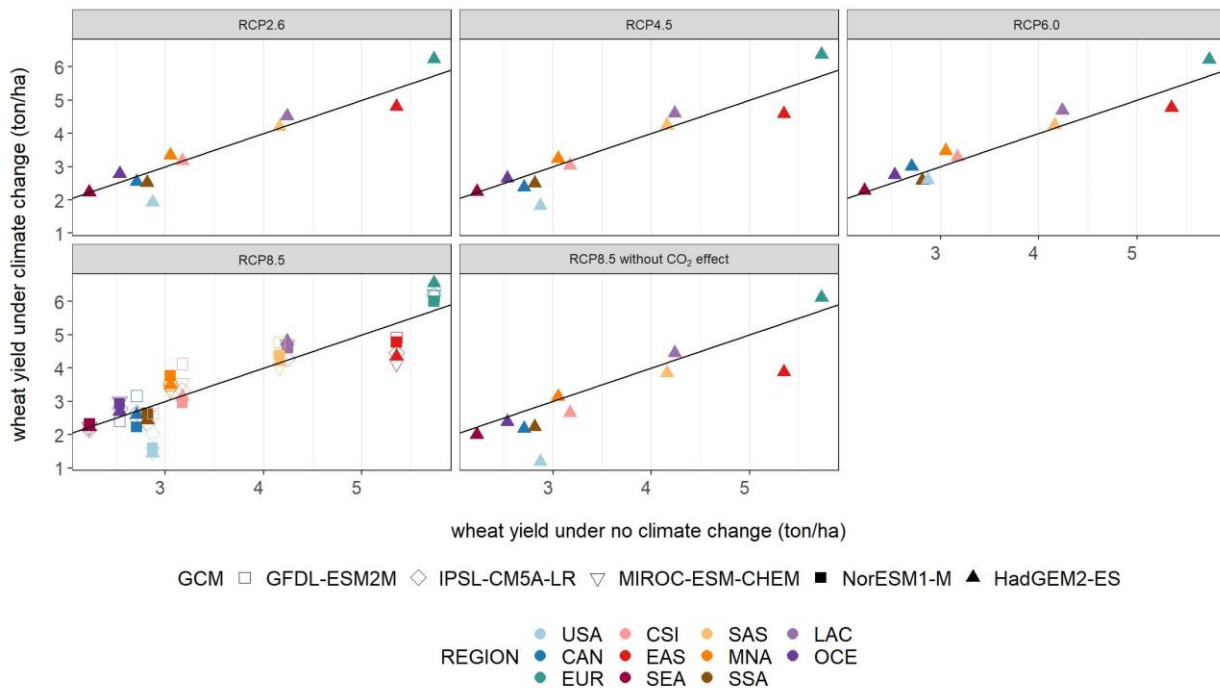

**Supplementary Fig. 4 | Wheat yield under climate change and no climate change in each region by 2050 projected by the EPIC crop model.** Yields in ton dry matter per ha. Under no climate change yields are determined by base year yield and assumptions on technological development over time, under climate change an additional climate impact shifter is applied.

## Supplementary Tables

**Supplementary Table 1 | Global agricultural trade adjustments under trade and climate change scenarios by 2050.**

Total trade growth and specific extensive margin trade growth, the latter indicated as new trade flows compared to the 2000 trade pattern, the baseline SSP2 trade pattern, or the No CC trade pattern. RCP: Representative Concentration Pathway, GCM: General Circulation Model. Climate change scenarios include the effect of CO<sub>2</sub> fertilization on crop yields. RCP8.5 is also implemented without the CO<sub>2</sub> effect (RCP8.5 wo).

| RCP                                       | GCM          | Trade scenario   | Trade adjustments                          |                                                        |                                                                 |                                                         |
|-------------------------------------------|--------------|------------------|--------------------------------------------|--------------------------------------------------------|-----------------------------------------------------------------|---------------------------------------------------------|
|                                           |              |                  | Total agricultural trade volume (1000 ton) | Total volume of new trade flows w.r.t. 2000 (1000 ton) | Total volume of new trade flows w.r.t. SSP2 baseline (1000 ton) | Total volume of new trade flows w.r.t. No CC (1000 ton) |
| <b>SPP2 Baseline</b>                      |              |                  |                                            |                                                        |                                                                 |                                                         |
| No CC                                     | None         | Baseline         | 2 231 882                                  | 34 485                                                 | 0                                                               | 0                                                       |
| <b>Trade and Climate Change scenarios</b> |              |                  |                                            |                                                        |                                                                 |                                                         |
| RCP2.6                                    | HadGEM2-ES   | Baseline         | 2 279 118                                  | 36 859                                                 | 27 603                                                          | 27 603                                                  |
| RCP4.5                                    | HadGEM2-ES   | Baseline         | 2 296 414                                  | 38 420                                                 | 27 019                                                          | 27 019                                                  |
| RCP6.0                                    | HadGEM2-ES   | Baseline         | 2 331 759                                  | 37 971                                                 | 36 719                                                          | 36 719                                                  |
| RCP8.5                                    | GFDL-ESM2M   | Baseline         | 2 392 550                                  | 35 078                                                 | 72 927                                                          | 72 927                                                  |
| RCP8.5                                    | HadGEM2-ES   | Baseline         | 2 312 236                                  | 40 476                                                 | 39 203                                                          | 39 203                                                  |
| RCP8.5                                    | IPSL-CM5A-LR | Baseline         | 2 310 881                                  | 38 543                                                 | 35 854                                                          | 35 854                                                  |
| RCP8.5                                    | MIROC        | Baseline         | 2 348 640                                  | 36 387                                                 | 38 593                                                          | 38 593                                                  |
| RCP8.5                                    | NorESM1-M    | Baseline         | 2 258 274                                  | 36 500                                                 | 24 813                                                          | 24 813                                                  |
| RCP8.5 wo                                 | HadGEM2-ES   | Baseline         | 2 296 093                                  | 44 733                                                 | 53 881                                                          | 53 881                                                  |
| No CC                                     | None         | Fixed imports    | 2 231 726                                  | 34 475                                                 | 0                                                               | 0                                                       |
| RCP2.6                                    | HadGEM2-ES   | Fixed imports    | 1 997 757                                  | 32 063                                                 | 0                                                               | 0                                                       |
| RCP4.5                                    | HadGEM2-ES   | Fixed imports    | 1 993 885                                  | 32 095                                                 | 0                                                               | 0                                                       |
| RCP6.0                                    | HadGEM2-ES   | Fixed imports    | 2 002 783                                  | 31 817                                                 | 0                                                               | 0                                                       |
| RCP8.5                                    | GFDL-ESM2M   | Fixed imports    | 2 081 805                                  | 31 172                                                 | 0                                                               | 0                                                       |
| RCP8.5                                    | HadGEM2-ES   | Fixed imports    | 1 896 043                                  | 31 165                                                 | 0                                                               | 0                                                       |
| RCP8.5                                    | IPSL-CM5A-LR | Fixed imports    | 1 983 152                                  | 30 977                                                 | 0                                                               | 0                                                       |
| RCP8.5                                    | MIROC        | Fixed imports    | 1 950 371                                  | 30 541                                                 | 0                                                               | 0                                                       |
| RCP8.5                                    | NorESM1-M    | Fixed imports    | 2 021 484                                  | 31 656                                                 | 0                                                               | 0                                                       |
| RCP8.5 wo                                 | HadGEM2-ES   | Fixed imports    | 1 814 691                                  | 31 475                                                 | 0                                                               | 0                                                       |
| No CC                                     | None         | Pre-Doha tariffs | 1 046 349                                  | 27 493                                                 | 194 246                                                         | 0                                                       |
| RCP2.6                                    | HadGEM2-ES   | Pre-Doha tariffs | 1 137 845                                  | 30 149                                                 | 206 727                                                         | 70 453                                                  |
| RCP4.5                                    | HadGEM2-ES   | Pre-Doha tariffs | 1 153 749                                  | 31 735                                                 | 200 281                                                         | 75 508                                                  |
| RCP6.0                                    | HadGEM2-ES   | Pre-Doha tariffs | 1 158 766                                  | 31 224                                                 | 212 409                                                         | 72 076                                                  |
| RCP8.5                                    | GFDL-ESM2M   | Pre-Doha tariffs | 1 190 440                                  | 28 164                                                 | 243 935                                                         | 57 923                                                  |
| RCP8.5                                    | HadGEM2-ES   | Pre-Doha tariffs | 1 205 015                                  | 34 072                                                 | 208 108                                                         | 99 349                                                  |
| RCP8.5                                    | IPSL-CM5A-LR | Pre-Doha tariffs | 1 172 956                                  | 31 732                                                 | 209 515                                                         | 67 207                                                  |
| RCP8.5                                    | MIROC        | Pre-Doha tariffs | 1 229 682                                  | 28 918                                                 | 221 895                                                         | 97 333                                                  |
| RCP8.5                                    | NorESM1-M    | Pre-Doha tariffs | 1 108 162                                  | 29 159                                                 | 197 632                                                         | 65 287                                                  |
| RCP8.5 wo                                 | HadGEM2-ES   | Pre-Doha tariffs | 1 272 373                                  | 38 217                                                 | 232 223                                                         | 133 426                                                 |

Supplementary Table 1 *continued*.

| RCP       | GCM          | Trade scenario        | Trade adjustments                          |                                                        |                                                                 |                                                         |
|-----------|--------------|-----------------------|--------------------------------------------|--------------------------------------------------------|-----------------------------------------------------------------|---------------------------------------------------------|
|           |              |                       | Total trade agricultural volume (1000 ton) | Total volume of new trade flows w.r.t. 2000 (1000 ton) | Total volume of new trade flows w.r.t. SSP2 baseline (1000 ton) | Total volume of new trade flows w.r.t. No CC (1000 ton) |
| No CC     | None         | Facilitation          | 4 808 943                                  | 45 157                                                 | 126 711                                                         | 0                                                       |
| RCP2.6    | HadGEM2-ES   | Facilitation          | 4 700 270                                  | 47 367                                                 | 143 739                                                         | 162 972                                                 |
| RCP4.5    | HadGEM2-ES   | Facilitation          | 4 637 072                                  | 50 034                                                 | 157 980                                                         | 180 892                                                 |
| RCP6.0    | HadGEM2-ES   | Facilitation          | 4 731 794                                  | 49 026                                                 | 147 581                                                         | 210 790                                                 |
| RCP8.5    | GFDL-ESM2M   | Facilitation          | 4 932 717                                  | 47 846                                                 | 161 146                                                         | 133 028                                                 |
| RCP8.5    | HadGEM2-ES   | Facilitation          | 4 375 589                                  | 52 343                                                 | 171 053                                                         | 361 853                                                 |
| RCP8.5    | IPSL-CM5A-LR | Facilitation          | 4 618 677                                  | 50 190                                                 | 163 629                                                         | 132 825                                                 |
| RCP8.5    | MIROC        | Facilitation          | 4 710 517                                  | 49 657                                                 | 195 841                                                         | 223 134                                                 |
| RCP8.5    | NorESM1-M    | Facilitation          | 4 750 893                                  | 50 412                                                 | 172 771                                                         | 105 570                                                 |
| RCP8.5 wo | HadGEM2-ES   | Facilitation          | 4 035 029                                  | 54 202                                                 | 187 829                                                         | 384 270                                                 |
| No CC     | None         | Tariff elimination    | 3 790 254                                  | 67 245                                                 | 657 770                                                         | 0                                                       |
| RCP2.6    | HadGEM2-ES   | Tariff elimination    | 3 879 544                                  | 67 863                                                 | 715 503                                                         | 33 870                                                  |
| RCP4.5    | HadGEM2-ES   | Tariff elimination    | 3 873 057                                  | 69 490                                                 | 674 132                                                         | 25 098                                                  |
| RCP6.0    | HadGEM2-ES   | Tariff elimination    | 3 975 979                                  | 68 151                                                 | 721 417                                                         | 34 852                                                  |
| RCP8.5    | GFDL-ESM2M   | Tariff elimination    | 3 987 976                                  | 64 978                                                 | 770 460                                                         | 52 951                                                  |
| RCP8.5    | HadGEM2-ES   | Tariff elimination    | 3 793 240                                  | 70 838                                                 | 672 491                                                         | 41 509                                                  |
| RCP8.5    | IPSL-CM5A-LR | Tariff elimination    | 3 840 614                                  | 67 378                                                 | 681 601                                                         | 45 064                                                  |
| RCP8.5    | MIROC        | Tariff elimination    | 3 915 428                                  | 65 089                                                 | 737 766                                                         | 45 928                                                  |
| RCP8.5    | NorESM1-M    | Tariff elimination    | 3 849 080                                  | 65 463                                                 | 699 887                                                         | 21 403                                                  |
| RCP8.5 wo | HadGEM2-ES   | Tariff elimination    | 3 592 066                                  | 77 612                                                 | 643 519                                                         | 47 724                                                  |
| No CC     | None         | Facilitation + Tariff | 7 376 216                                  | 120 597                                                | 2 271 954                                                       | 0                                                       |
| RCP2.6    | HadGEM2-ES   | Facilitation + Tariff | 7 274 863                                  | 118 722                                                | 2 258 514                                                       | 138 416                                                 |
| RCP4.5    | HadGEM2-ES   | Facilitation + Tariff | 7 041 356                                  | 119 501                                                | 2 039 335                                                       | 176 055                                                 |
| RCP6.0    | HadGEM2-ES   | Facilitation + Tariff | 7 559 279                                  | 118 072                                                | 2 361 007                                                       | 73 203                                                  |
| RCP8.5    | GFDL-ESM2M   | Facilitation + Tariff | 8 077 702                                  | 116 314                                                | 2 718 236                                                       | 95 738                                                  |
| RCP8.5    | HadGEM2-ES   | Facilitation + Tariff | 6 576 789                                  | 118 638                                                | 2 066 236                                                       | 195 542                                                 |
| RCP8.5    | IPSL-CM5A-LR | Facilitation + Tariff | 7 089 250                                  | 120 332                                                | 2 079 449                                                       | 124 048                                                 |
| RCP8.5    | MIROC        | Facilitation + Tariff | 7 115 186                                  | 114 886                                                | 2 275 812                                                       | 143 824                                                 |
| RCP8.5    | NorESM1-M    | Facilitation + Tariff | 7 424 135                                  | 120 259                                                | 2 290 354                                                       | 74 486                                                  |
| RCP8.5 wo | HadGEM2-ES   | Facilitation + Tariff | 5 937 251                                  | 119 122                                                | 1 745 582                                                       | 303 873                                                 |

GCM MIROC: MIROC-ESM-CHEM

**Supplementary Table 2 | Global market responses to trade scenarios compared to the *Baseline trade* scenario by 2050 under the different climate change scenarios.** RCP: Representative Concentration Pathway, GCM: General Circulation Model. Climate change scenarios include the effect of CO<sub>2</sub> fertilization on crop yields. RCP8.5 is also implemented without the CO<sub>2</sub> effect (RCP8.5 wo). Global crop production efficiency is defined as the total global crop production over the total global cropland area.

| RCP       | GCM          | Trade scenario   | Market responses                                                           |                                                                         |                                                                              |                                                                       |
|-----------|--------------|------------------|----------------------------------------------------------------------------|-------------------------------------------------------------------------|------------------------------------------------------------------------------|-----------------------------------------------------------------------|
|           |              |                  | Global crop production efficiency, difference to <i>Baseline trade</i> (%) | Global crop calorie production, difference to <i>Baseline trade</i> (%) | Global food availability, difference to <i>Baseline Trade</i> (kcal/cap/day) | Agricultural prices, difference compared to <i>Baseline trade</i> (%) |
| No CC     | None         | Fixed imports    | 0.00%                                                                      | 0.00%                                                                   | 0.00                                                                         | 0.09%                                                                 |
| RCP2.6    | HadGEM2-ES   | Fixed imports    | -1.87%                                                                     | -1.92%                                                                  | -14.24                                                                       | 1.90%                                                                 |
| RCP4.5    | HadGEM2-ES   | Fixed imports    | -1.87%                                                                     | -2.06%                                                                  | -11.70                                                                       | 2.36%                                                                 |
| RCP6.0    | HadGEM2-ES   | Fixed imports    | -1.56%                                                                     | -2.18%                                                                  | -14.39                                                                       | 2.16%                                                                 |
| RCP8.5    | GFDL-ESM2M   | Fixed imports    | -1.97%                                                                     | -2.40%                                                                  | -16.41                                                                       | 2.18%                                                                 |
| RCP8.5    | IPSL-CM5A-LR | Fixed imports    | -1.56%                                                                     | -2.24%                                                                  | -18.13                                                                       | 3.08%                                                                 |
| RCP8.5    | MIROC        | Fixed imports    | -2.22%                                                                     | -2.77%                                                                  | -16.70                                                                       | 16.68%                                                                |
| RCP8.5    | NorESM1-M    | Fixed imports    | -1.05%                                                                     | -1.48%                                                                  | -9.53                                                                        | 1.72%                                                                 |
| RCP8.5    | HadGEM2-ES   | Fixed imports    | -2.24%                                                                     | -2.35%                                                                  | -19.52                                                                       | 3.42%                                                                 |
| RCP8.5 wo | HadGEM2-ES   | Fixed imports    | -2.45%                                                                     | -2.67%                                                                  | -36.85                                                                       | 8.58%                                                                 |
| No CC     | None         | Pre-Doha tariffs | -2.63%                                                                     | -4.19%                                                                  | -50.43                                                                       | 5.13%                                                                 |
| RCP2.6    | HadGEM2-ES   | Pre-Doha tariffs | -2.37%                                                                     | -3.51%                                                                  | -41.43                                                                       | 4.39%                                                                 |
| RCP4.5    | HadGEM2-ES   | Pre-Doha tariffs | -1.89%                                                                     | -3.23%                                                                  | -41.76                                                                       | 4.17%                                                                 |
| RCP6.0    | HadGEM2-ES   | Pre-Doha tariffs | -2.07%                                                                     | -3.62%                                                                  | -45.85                                                                       | 4.47%                                                                 |
| RCP8.5    | GFDL-ESM2M   | Pre-Doha tariffs | -2.74%                                                                     | -4.20%                                                                  | -44.35                                                                       | 4.74%                                                                 |
| RCP8.5    | IPSL-CM5A-LR | Pre-Doha tariffs | -1.65%                                                                     | -3.08%                                                                  | -41.95                                                                       | 4.16%                                                                 |
| RCP8.5    | MIROC        | Pre-Doha tariffs | -2.07%                                                                     | -3.39%                                                                  | -46.69                                                                       | 4.43%                                                                 |
| RCP8.5    | NorESM1-M    | Pre-Doha tariffs | -1.86%                                                                     | -3.30%                                                                  | -42.92                                                                       | 4.24%                                                                 |
| RCP8.5    | HadGEM2-ES   | Pre-Doha tariffs | -1.61%                                                                     | -2.62%                                                                  | -42.45                                                                       | 4.24%                                                                 |
| RCP8.5 wo | HadGEM2-ES   | Pre-Doha tariffs | -1.51%                                                                     | -2.19%                                                                  | -39.44                                                                       | 4.41%                                                                 |
| No CC     | None         | Facilitation     | 2.66%                                                                      | 1.49%                                                                   | 31.65                                                                        | -3.23%                                                                |
| RCP2.6    | HadGEM2-ES   | Facilitation     | 2.29%                                                                      | 1.53%                                                                   | 35.35                                                                        | -3.40%                                                                |
| RCP4.5    | HadGEM2-ES   | Facilitation     | 1.55%                                                                      | 1.12%                                                                   | 35.96                                                                        | -3.51%                                                                |
| RCP6.0    | HadGEM2-ES   | Facilitation     | 3.11%                                                                      | 2.48%                                                                   | 35.34                                                                        | -3.81%                                                                |
| RCP8.5    | GFDL-ESM2M   | Facilitation     | 3.11%                                                                      | 2.10%                                                                   | 33.37                                                                        | -3.85%                                                                |
| RCP8.5    | IPSL-CM5A-LR | Facilitation     | 1.93%                                                                      | 1.46%                                                                   | 28.09                                                                        | -3.64%                                                                |
| RCP8.5    | MIROC        | Facilitation     | 1.06%                                                                      | 0.55%                                                                   | 33.89                                                                        | -3.41%                                                                |
| RCP8.5    | NorESM1-M    | Facilitation     | 1.82%                                                                      | 1.19%                                                                   | 35.42                                                                        | -3.46%                                                                |
| RCP8.5    | HadGEM2-ES   | Facilitation     | 1.63%                                                                      | 1.34%                                                                   | 32.48                                                                        | -3.84%                                                                |
| RCP8.5 wo | HadGEM2-ES   | Facilitation     | 1.62%                                                                      | 1.19%                                                                   | 25.35                                                                        | -3.45%                                                                |

Supplementary Table 2 *continued*.

| RCP       | GCM          | Trade scenario        | Market responses                                                      |                                                                         |                                                                              |                                                                       |
|-----------|--------------|-----------------------|-----------------------------------------------------------------------|-------------------------------------------------------------------------|------------------------------------------------------------------------------|-----------------------------------------------------------------------|
|           |              |                       | Global production efficiency, difference to <i>Baseline trade</i> (%) | Global crop calorie production, difference to <i>Baseline trade</i> (%) | Global food availability, difference to <i>Baseline trade</i> (kcal/cap/day) | Agricultural prices, difference compared to <i>Baseline trade</i> (%) |
| No CC     | None         | Tariff elimination    | 2.34%                                                                 | 1.86%                                                                   | 29.29                                                                        | -3.59%                                                                |
| RCP2.6    | HadGEM2-ES   | Tariff elimination    | 1.78%                                                                 | 1.52%                                                                   | 27.94                                                                        | -3.55%                                                                |
| RCP4.5    | HadGEM2-ES   | Tariff elimination    | 1.85%                                                                 | 1.58%                                                                   | 28.78                                                                        | -3.60%                                                                |
| RCP6.0    | HadGEM2-ES   | Tariff elimination    | 2.29%                                                                 | 2.01%                                                                   | 30.56                                                                        | -3.74%                                                                |
| RCP8.5    | GFDL-ESM2M   | Tariff elimination    | 1.70%                                                                 | 1.23%                                                                   | 23.31                                                                        | -3.22%                                                                |
| RCP8.5    | IPSL-CM5A-LR | Tariff elimination    | 1.90%                                                                 | 1.72%                                                                   | 29.23                                                                        | -3.53%                                                                |
| RCP8.5    | MIROC        | Tariff elimination    | 1.92%                                                                 | 1.72%                                                                   | 27.63                                                                        | -3.65%                                                                |
| RCP8.5    | NorESM1-M    | Tariff elimination    | 2.06%                                                                 | 1.85%                                                                   | 25.23                                                                        | -3.82%                                                                |
| RCP8.5    | HadGEM2-ES   | Tariff elimination    | 1.79%                                                                 | 1.67%                                                                   | 31.95                                                                        | -3.64%                                                                |
| RCP8.5 wo | HadGEM2-ES   | Tariff elimination    | 1.53%                                                                 | 1.17%                                                                   | 18.11                                                                        | -2.54%                                                                |
| NoCC      | None         | Facilitation + Tariff | 2.03%                                                                 | 0.06%                                                                   | 65.49                                                                        | -9.75%                                                                |
| RCP2.6    | HadGEM2-ES   | Facilitation + Tariff | 2.87%                                                                 | 1.57%                                                                   | 73.87                                                                        | -11.23%                                                               |
| RCP4.5    | HadGEM2-ES   | Facilitation + Tariff | 2.14%                                                                 | 1.36%                                                                   | 67.91                                                                        | -10.93%                                                               |
| RCP6.0    | HadGEM2-ES   | Facilitation + Tariff | 2.98%                                                                 | 1.98%                                                                   | 72.34                                                                        | -11.53%                                                               |
| RCP8.5    | GFDL-ESM2M   | Facilitation + Tariff | 2.52%                                                                 | 1.37%                                                                   | 75.56                                                                        | -11.77%                                                               |
| RCP8.5    | IPSL-CM5A-LR | Facilitation + Tariff | 2.52%                                                                 | 1.96%                                                                   | 69.11                                                                        | -11.43%                                                               |
| RCP8.5    | MIROC        | Facilitation + Tariff | 1.55%                                                                 | 1.17%                                                                   | 71.06                                                                        | -11.85%                                                               |
| RCP8.5    | NorESM1-M    | Facilitation + Tariff | 2.15%                                                                 | 1.56%                                                                   | 75.34                                                                        | -11.95%                                                               |
| RCP8.5    | HadGEM2-ES   | Facilitation + Tariff | 2.70%                                                                 | 2.36%                                                                   | 68.54                                                                        | -10.96%                                                               |
| RCP8.5 wo | HadGEM2-ES   | Facilitation + Tariff | 2.35%                                                                 | 1.60%                                                                   | 53.64                                                                        | -8.72%                                                                |

GCM MIROC: MIROC-ESM-CHEM



**Supplementary Table 3 | Impact of crop yields and trade costs on risk of hunger and food availability by region.** Results from OLS regression of the impact of crop yield change (1), trade costs (2), and both (3) on food availability and risk of hunger including regional interaction effects. Regression models and sample are described in Method.

|                                   |             | Population at risk of hunger (million) |            |            | Food availability (kcal/cap/day) |             |             |  |  |
|-----------------------------------|-------------|----------------------------------------|------------|------------|----------------------------------|-------------|-------------|--|--|
|                                   |             | (1)                                    | (2)        | (3)        | (1)                              | (2)         | (3)         |  |  |
| Crop yield (% change)             | CSI         | -0.56 *                                |            | -0.37      | 223.36 ***                       |             | 233.73 ***  |  |  |
|                                   |             | (0.31)                                 |            | (0.34)     | (32.47)                          |             | (40.29)     |  |  |
|                                   | EAS         | -10.74                                 |            | -12.78 *** | 230.18                           |             | 267.68 ***  |  |  |
|                                   |             | (9.43)                                 |            | (4.18)     | (175.86)                         |             | (69.10)     |  |  |
|                                   | LAC         | -6.52 ***                              |            | -3.24 ***  | 355.64 ***                       |             | 283.90 ***  |  |  |
|                                   |             | (1.90)                                 |            | (1.24)     | (76.29)                          |             | (63.92)     |  |  |
|                                   | MNA         | -0.20                                  |            | 1.76       | 175.42                           |             | 137.27 ***  |  |  |
|                                   |             | (7.29)                                 |            | (2.87)     | (139.37)                         |             | (51.39)     |  |  |
|                                   | OCE         | -0.19                                  |            | -0.27      | 214.93                           |             | 192.17      |  |  |
|                                   |             | (0.15)                                 |            | (0.31)     | (161.74)                         |             | (291.50)    |  |  |
| SAS                               | -81.21 ***  |                                        | -82.83 *** | 485.73 *** |                                  | 475.97 ***  |             |  |  |
|                                   | (16.18)     |                                        | (21.66)    | (73.48)    |                                  | (93.33)     |             |  |  |
| SEA                               | -10.94 **   |                                        | -11.21 *   | 372.98 *** |                                  | 383.02 ***  |             |  |  |
|                                   | (5.42)      |                                        | (5.85)     | (116.26)   |                                  | (121.74)    |             |  |  |
| SSA                               | -105.86 *** |                                        | -29.70     | 928.48 **  |                                  | 317.41      |             |  |  |
|                                   | (38.34)     |                                        | (22.43)    | (365.54)   |                                  | (254.20)    |             |  |  |
| USA                               | -0.07 ***   |                                        | -0.06      | 156.78 *** |                                  | 136.54 *    |             |  |  |
|                                   | (0.02)      |                                        | (0.04)     | (47.00)    |                                  | (74.61)     |             |  |  |
| Trade cost (log of US\$/106 kcal) | CSI         |                                        | 0.49 ***   | 0.48 ***   |                                  | -31.78 ***  | -28.47 *    |  |  |
|                                   |             |                                        | (0.09)     | (0.12)     |                                  | (11.85)     | (14.25)     |  |  |
|                                   | EAS         |                                        | 6.99 ***   | 6.61 ***   |                                  | -137.53 *** | -132.81 *** |  |  |
|                                   |             |                                        | (0.46)     | (0.45)     |                                  | (8.38)      | (7.41)      |  |  |
|                                   | LAC         |                                        | 1.16 ***   | 1.07 ***   |                                  | -21.60 ***  | -17.53 *    |  |  |
|                                   |             |                                        | (0.20)     | (0.18)     |                                  | (7.52)      | (7.94)      |  |  |
|                                   | MNA         |                                        | 11.36 ***  | 11.36 ***  |                                  | -233.76 *** | -231.44 *** |  |  |
|                                   |             |                                        | (0.47)     | (0.55)     |                                  | (11.98)     | (10.97)     |  |  |
|                                   | OCE         |                                        | -0.16 ***  | -0.17 ***  |                                  | 172.75 ***  | 174.33 ***  |  |  |
|                                   |             |                                        | (0.03)     | (0.05)     |                                  | (31.88)     | (51.23)     |  |  |
| SAS                               |             | 5.42 ***                               | 5.39 *     |            | -27.80 ***                       | -32.17 *    |             |  |  |
|                                   |             | (2.03)                                 | (3.02)     |            | (10.20)                          | (15.00)     |             |  |  |
| SEA                               |             | -0.11                                  | 0.00       |            | 15.28                            | 11.11       |             |  |  |
|                                   |             | (0.53)                                 | (0.63)     |            | (12.96)                          | (14.33)     |             |  |  |
| SSA                               |             | 26.18 ***                              | 24.29 ***  |            | -257.76 ***                      | -248.05 *** |             |  |  |
|                                   |             | (2.56)                                 | (2.41)     |            | (15.77)                          | (16.51)     |             |  |  |
| USA                               |             | 0.03 ***                               | 0.03 ***   |            | -67.11 ***                       | -58.26 ***  |             |  |  |
|                                   |             | (0.01)                                 | (0.01)     |            | (15.39)                          | (16.30)     |             |  |  |
| Crop yield x Trade cost           | CSI         |                                        |            | -0.19      |                                  |             | 112.59 ***  |  |  |
|                                   |             |                                        |            | (0.33)     |                                  |             | (34.44)     |  |  |
|                                   | EAS         |                                        |            | -10.56     |                                  |             | 140.65      |  |  |
|                                   |             |                                        |            | (7.95)     |                                  |             | (91.48)     |  |  |
|                                   | LAC         |                                        |            | 8.32       |                                  |             | -201.69     |  |  |
|                                   |             |                                        |            | (5.93)     |                                  |             | (216.83)    |  |  |
|                                   | MNA         |                                        |            | 3.24       |                                  |             | -81.95      |  |  |
|                                   |             |                                        |            | (3.19)     |                                  |             | (72.73)     |  |  |
|                                   | OCE         |                                        |            | -0.04      |                                  |             | 180.52      |  |  |
|                                   |             |                                        |            | (0.28)     |                                  |             | (237.69)    |  |  |
| SAS                               |             |                                        | -2.18      |            |                                  | -33.26      |             |  |  |
|                                   |             |                                        | (26.74)    |            |                                  | (104.01)    |             |  |  |
| SEA                               |             |                                        | 1.47       |            |                                  | -55.54      |             |  |  |
|                                   |             |                                        | (6.32)     |            |                                  | (120.10)    |             |  |  |
| SSA                               |             |                                        | -41.85     |            |                                  | -15.56      |             |  |  |
|                                   |             |                                        | (29.88)    |            |                                  | (186.45)    |             |  |  |
| USA                               |             |                                        | -0.01      |            |                                  | 14.40       |             |  |  |
|                                   |             |                                        | (0.05)     |            |                                  | (79.25)     |             |  |  |

Significance levels: \*p<0.1; \*\*p<0.05; \*\*\*p<0.01. Heteroskedastic robust standard errors in brackets. EUR and CAN are not included as zero hunger. N = 450. Adjusted R squared is 0.999 for food availability (1) - (3) and 0.947 (1), 0.961 (2) and 0.976 (3) for hunger regressions.

Supplementary Table 4 | Aggregate regions, GLOBIOM regions and countries.

| <b>Aggregate Region</b> | <b>GLOBIOM Region</b>                               | <b>Country</b>                                                                                                                                                                                        |
|-------------------------|-----------------------------------------------------|-------------------------------------------------------------------------------------------------------------------------------------------------------------------------------------------------------|
| CAN                     | Canada                                              | Canada                                                                                                                                                                                                |
| CSI                     | Former USSR                                         | Belarus, Moldova, Ukraine, Russia, Azerbaidjan, Kazakhstan, Turkmenistan, Uzbekistan, Armenia, Georgia, Kyrgyzstan, Tajikistan                                                                        |
| EAS                     | China                                               | People's Republic of China, Hong Kong                                                                                                                                                                 |
|                         | Japan                                               | Japan                                                                                                                                                                                                 |
|                         | South Korea                                         | Korea                                                                                                                                                                                                 |
| EUR                     | EU Baltic                                           | Estonia, Latvia, Lithuania                                                                                                                                                                            |
|                         | EU Central East                                     | Bulgaria, Czech Republic, Hungary, Poland, Romania, Slovakia, Slovenia                                                                                                                                |
|                         | EU Mid-West                                         | Austria, Belgium, France, Germany, Luxembourg, Netherlands                                                                                                                                            |
|                         | EU North                                            | Denmark, Finland, Ireland, Sweden, United Kingdom                                                                                                                                                     |
|                         | EU South                                            | Cyprus, Greece, Italy, Malta, Portugal, Spain                                                                                                                                                         |
|                         | Rest of Central Eastern Europe (RCEU)               | Albania, Bosnia Herzegovina, Croatia, Macedonia, Serbia                                                                                                                                               |
|                         | Rest of Western Europe (ROWE)                       | Iceland, Norway, Switzerland, Greenland                                                                                                                                                               |
| LAC                     | Brazil                                              | Brazil                                                                                                                                                                                                |
|                         | Mexico                                              | Mexico                                                                                                                                                                                                |
|                         | Central America (RCAM)                              | Bahamas, Belize, Costa Rica, Cuba, Dominican Republic, El Salvador, Guadeloupe, Guatemala, Jamaica, Nicaragua, Panama, Trinidad and Tobago                                                            |
|                         | South America (RSAM)                                | Argentina, Bolivia, Chile, Colombia, Ecuador, Guyana, Paraguay, Peru, Suriname, Uruguay, Venezuela                                                                                                    |
| MNA                     | Middle East and North Africa                        | Egypt, Algeria, Libya, Morocco, Tunisia, Bahrain, Iran, Iraq, Israel, Jordan, Kuwait, Lebanon, Oman, Qatar, Saudi Arabia, Syria, United Arab Emirates, Yemen                                          |
|                         | Turkey                                              | Turkey                                                                                                                                                                                                |
| OCE                     | ANZ                                                 | Australia, New Zealand                                                                                                                                                                                |
|                         | Pacific Islands                                     | Fiji, French Polynesia, New Caledonia, Papua New Guinea, Samoa, Solomon Islands, Vanuatu                                                                                                              |
| SAS                     | India                                               | India                                                                                                                                                                                                 |
|                         | Rest of South Asia (RSAS)                           | Afghanistan, Bangladesh, Bhutan, Nepal, Pakistan, Sri Lanka                                                                                                                                           |
| SEA                     | South East Asia – other Pacific Asia (RSEA_OPA)     | Brunei Daressalam, Indonesia, Malaysia, Myanmar, Philippines, Singapore, Thailand, East Timor                                                                                                         |
|                         | South East Asia – (ex-)planned economies (RSEA_PAC) | Cambodia, DPR of Korea, Laos, Mongolia, Viet Nam                                                                                                                                                      |
| SSA                     | Congo Basin                                         | Cameroon, Central African Republic, Congo Republic, Democratic Republic of Congo, Equatorial Guinea, Gabon                                                                                            |
|                         | Eastern Africa                                      | Burundi, Ethiopia, Kenya, Tanzania, Uganda, Rwanda                                                                                                                                                    |
|                         | South Africa                                        | South Africa                                                                                                                                                                                          |
|                         | Southern Africa                                     | Angola, Botswana, Comoros, Lesotho, Madagascar, Malawi, Mauritius, Mozambique, Namibia, Reunion, Swaziland, Zambia, Zimbabwe                                                                          |
|                         | Western Africa and Rest of Sub-Saharan Africa       | Benin, Burkina Faso, Cape Verde, Chad, Côte d'Ivoire, Djibouti, Eritrea, Gambia, Ghana, Guinea, Guinea-Bissau, Liberia, Mali, Mauritania, Niger, Nigeria, Senegal, Sierra Leone, Somalia, Sudan, Togo |
| USA                     | USA Region                                          | United States, Puerto Rico                                                                                                                                                                            |

**Supplementary Table 5 | Descriptive statistics of the dependent and explanatory variables (at regional level).** The sample is composed of observations for the 11 regions for five trade scenarios (Baseline, pre-Doha tariffs, Facilitation, Tariff elimination, and Facilitation + Tariff elimination) and 10 climate change scenarios (N = 550).

|                                         | Min   | Average | Max    |
|-----------------------------------------|-------|---------|--------|
| Population at risk of hunger (million)  | 0.00  | 12.04   | 63.06  |
| Food availability (kcal/cap/day)        | 2518  | 3074    | 3510   |
| Crop yield (difference with NoCC)       | -38%  | -5%     | +35%   |
| Trade costs (US\$/10 <sup>6</sup> kcal) | 17.91 | 73.93   | 225.66 |

**Supplementary Table 6 | Average ad valorem tariffs on GLOBIOM agricultural goods in 2001 and 2010.** Tariff rates from MAcMap-HS6 database 2001 and 2010 with weighted average by macro-region and product based on MAcMap reference group weights<sup>1,2</sup>. Specific tariffs are converted to ad valorem equivalent with MAcMap unit values.

| REGION | All agricultural goods |        |        |        |
|--------|------------------------|--------|--------|--------|
|        | 2001                   |        | 2010   |        |
|        | import                 | export | import | export |
| CAN    | 16.63%                 | 7.73%  | 26.86% | 11.41% |
| CSI    | 14.02%                 | 12.41% | 12.16% | 15.21% |
| EAS    | 39.15%                 | 22.91% | 27.51% | 14.12% |
| EUR    | 14.10%                 | 14.23% | 9.49%  | 12.65% |
| LAC    | 19.96%                 | 19.09% | 14.28% | 14.87% |
| MNA    | 19.68%                 | 21.00% | 18.54% | 19.31% |
| OCE    | 1.89%                  | 30.55% | 1.97%  | 25.04% |
| SAS    | 47.21%                 | 27.98% | 31.45% | 21.70% |
| SEA    | 9.63%                  | 21.49% | 4.32%  | 16.51% |
| SSA    | 21.98%                 | 10.40% | 14.70% | 7.86%  |
| USA    | 4.45%                  | 20.39% | 4.79%  | 15.56% |

  

| REGION | Wheat  |        |        |        |
|--------|--------|--------|--------|--------|
|        | 2001   |        | 2010   |        |
|        | import | export | import | export |
| CAN    | 1.59%  | 14.06% | 0.00%  | 20.42% |
| CSI    | 10.43% | 19.41% | 5.41%  | 28.01% |
| EAS    | 28.70% | 22.85% | 63.16% | 10.31% |
| EUR    | 12.37% | 17.00% | 7.95%  | 17.53% |
| LAC    | 9.78%  | 12.36% | 5.29%  | 26.38% |
| MNA    | 16.60% | 14.96% | 17.84% | 21.10% |
| OCE    | 0.03%  | 16.32% | 0.03%  | 20.70% |
| SAS    | 67.42% | 15.08% | 25.60% | 17.92% |
| SEA    | 7.77%  | 25.88% | 2.52%  | 19.15% |
| SSA    | 11.66% | 16.09% | 5.73%  | 18.08% |
| USA    | 2.37%  | 15.15% | 1.46%  | 20.43% |

Supplementary Table 6 *continued.*

| Corn   |        |        |        |        |
|--------|--------|--------|--------|--------|
| REGION | 2001   |        | 2010   |        |
|        | import | export | import | export |
| CAN    | 0.00%  | 17.24% | 0.00%  | 24.83% |
| CSI    | 8.87%  | 21.54% | 2.14%  | 33.52% |
| EAS    | 67.84% | 30.98% | 82.49% | 18.45% |
| EUR    | 19.39% | 20.36% | 1.82%  | 19.35% |
| LAC    | 35.90% | 25.38% | 5.43%  | 28.14% |
| MNA    | 25.96% | 13.30% | 29.86% | 12.47% |
| OCE    | 0.05%  | 26.33% | 0.13%  | 18.42% |
| SAS    | 41.65% | 11.48% | 9.46%  | 18.49% |
| SEA    | 17.86% | 27.34% | 4.48%  | 17.97% |
| SSA    | 27.80% | 28.40% | 7.37%  | 11.43% |
| USA    | 1.06%  | 30.09% | 0.32%  | 23.52% |

  

| Rice   |         |         |         |        |
|--------|---------|---------|---------|--------|
| REGION | 2001    |         | 2010    |        |
|        | import  | export  | import  | export |
| CAN    | 0.00%   | 100.96% | 0.00%   | 30.71% |
| CSI    | 8.95%   | 31.17%  | 14.60%  | 34.24% |
| EAS    | 362.15% | 52.40%  | 116.56% | 29.45% |
| EUR    | 71.19%  | 81.67%  | 16.70%  | 27.32% |
| LAC    | 21.48%  | 37.22%  | 13.67%  | 33.46% |
| MNA    | 18.51%  | 34.70%  | 13.60%  | 35.93% |
| OCE    | 0.00%   | 74.20%  | 0.32%   | 23.82% |
| SAS    | 56.15%  | 60.86%  | 25.84%  | 30.20% |
| SEA    | 14.76%  | 89.21%  | 21.75%  | 26.92% |
| SSA    | 28.34%  | 36.85%  | 10.80%  | 20.21% |
| USA    | 4.15%   | 70.13%  | 2.17%   | 29.06% |

  

| Soya   |         |        |        |        |
|--------|---------|--------|--------|--------|
| REGION | 2001    |        | 2010   |        |
|        | import  | export | import | export |
| CAN    | 0.00%   | 20.57% | 0.00%  | 17.00% |
| CSI    | 2.87%   | 28.40% | 0.13%  | 10.18% |
| EAS    | 130.66% | 18.22% | 17.99% | 20.27% |
| EUR    | 1.90%   | 20.67% | 0.87%  | 16.13% |
| LAC    | 3.83%   | 25.52% | 3.66%  | 7.61%  |
| MNA    | 3.79%   | 21.88% | 3.40%  | 3.18%  |
| OCE    | 0.03%   | 22.12% | 0.40%  | 17.66% |
| SAS    | 27.42%  | 18.87% | 26.82% | 15.71% |
| SEA    | 6.01%   | 33.85% | 1.51%  | 3.71%  |
| SSA    | 3.43%   | 11.53% | 6.78%  | 9.08%  |
| USA    | 0.00%   | 25.27% | 0.00%  | 6.52%  |

**Supplementary Table 7 | Average total trade cost (USD/ton) on agricultural trade for each region in 2000 and 2010, and in 2050 across trade scenarios. The aggregation is described in Method.**

| Trade scenario                | Region | Tariff cost | Transport cost | Trade expansion cost <sup>1</sup> | Total trade cost |
|-------------------------------|--------|-------------|----------------|-----------------------------------|------------------|
| 2000 – Baseline trade         | CAN    | 37          | 248            | /                                 | 285              |
|                               | CSI    | 35          | 389            | /                                 | 424              |
|                               | EAS    | 185         | 721            | /                                 | 906              |
|                               | EUR    | 44          | 353            | /                                 | 398              |
|                               | LAC    | 37          | 261            | /                                 | 298              |
|                               | MNA    | 33          | 272            | /                                 | 305              |
|                               | OCE    | 126         | 812            | /                                 | 937              |
|                               | SAS    | 173         | 211            | /                                 | 384              |
|                               | SEA    | 89          | 581            | /                                 | 670              |
|                               | SSA    | 35          | 494            | /                                 | 530              |
|                               | USA    | 57          | 283            | /                                 | 339              |
| 2010 – Baseline trade         | CAN    | 25          | 215            | 28                                | 268              |
|                               | CSI    | 19          | 314            | 33                                | 365              |
|                               | EAS    | 219         | 499            | 129                               | 846              |
|                               | EUR    | 20          | 328            | 34                                | 382              |
|                               | LAC    | 29          | 250            | 29                                | 308              |
|                               | MNA    | 24          | 243            | 27                                | 294              |
|                               | OCE    | 120         | 508            | 147                               | 775              |
|                               | SAS    | 117         | 184            | 53                                | 354              |
|                               | SEA    | 177         | 560            | 74                                | 811              |
|                               | SSA    | 22          | 412            | 46                                | 480              |
|                               | USA    | 32          | 236            | 25                                | 293              |
| 2050 – Baseline trade         | CAN    | 20          | 139            | 6                                 | 165              |
|                               | CSI    | 12          | 188            | 9                                 | 209              |
|                               | EAS    | 61          | 107            | 11                                | 179              |
|                               | EUR    | 17          | 163            | 20                                | 200              |
|                               | LAC    | 14          | 147            | 11                                | 171              |
|                               | MNA    | 18          | 143            | 38                                | 199              |
|                               | OCE    | 256         | 117            | 58                                | 431              |
|                               | SAS    | 62          | 75             | 18                                | 155              |
|                               | SEA    | 38          | 126            | 11                                | 175              |
|                               | SSA    | 18          | 86             | 16                                | 121              |
|                               | USA    | 24          | 92             | 18                                | 135              |
| 2050 – Pre-Doha tariff levels | CAN    | 8           | 142            | 8                                 | 158              |
|                               | CSI    | 18          | 262            | 8                                 | 288              |
|                               | EAS    | 98          | 267            | 6                                 | 371              |
|                               | EUR    | 20          | 228            | 24                                | 272              |
|                               | LAC    | 23          | 186            | 9                                 | 218              |
|                               | MNA    | 24          | 181            | 53                                | 258              |
|                               | OCE    | 54          | 294            | 48                                | 397              |
|                               | SAS    | 189         | 130            | 25                                | 343              |
|                               | SEA    | 103         | 339            | 16                                | 458              |
|                               | SSA    | 23          | 206            | 19                                | 249              |
| USA                           | 36     | 187         | 10             | 233                               |                  |

Supplementary Table 7 *continued*.

| Trade scenario                                 | Region | Tariff cost | Transport cost | Trade expansion cost <sup>1</sup> | Total trade cost |
|------------------------------------------------|--------|-------------|----------------|-----------------------------------|------------------|
| 2050 – Trade facilitation                      | CAN    | 27          | 125            | 7                                 | 160              |
|                                                | CSI    | 12          | 111            | 2                                 | 125              |
|                                                | EAS    | 62          | 76             | 1                                 | 139              |
|                                                | EUR    | 23          | 90             | 1                                 | 115              |
|                                                | LAC    | 18          | 106            | 3                                 | 127              |
|                                                | MNA    | 26          | 94             | 5                                 | 125              |
|                                                | OCE    | 231         | 71             | 9                                 | 311              |
|                                                | SAS    | 48          | 71             | 2                                 | 121              |
|                                                | SEA    | 36          | 99             | 2                                 | 137              |
|                                                | SSA    | 42          | 108            | 4                                 | 154              |
|                                                | USA    | 36          | 79             | 3                                 | 118              |
| 2050 – Tariff elimination                      | CAN    | 0           | 131            | 15                                | 146              |
|                                                | CSI    | 0           | 144            | 21                                | 164              |
|                                                | EAS    | 0           | 68             | 15                                | 83               |
|                                                | EUR    | 0           | 100            | 34                                | 135              |
|                                                | LAC    | 0           | 101            | 16                                | 117              |
|                                                | MNA    | 0           | 104            | 36                                | 140              |
|                                                | OCE    | 0           | 96             | 48                                | 143              |
|                                                | SAS    | 0           | 64             | 19                                | 83               |
|                                                | SEA    | 0           | 103            | 16                                | 119              |
|                                                | SSA    | 0           | 79             | 26                                | 105              |
|                                                | USA    | 0           | 76             | 21                                | 97               |
| 2050 – Trade facilitation + Tariff elimination | CAN    | 0           | 97             | 5                                 | 102              |
|                                                | CSI    | 0           | 64             | 24                                | 88               |
|                                                | EAS    | 0           | 64             | 5                                 | 69               |
|                                                | EUR    | 0           | 71             | 20                                | 91               |
|                                                | LAC    | 0           | 67             | 3                                 | 70               |
|                                                | MNA    | 0           | 71             | 6                                 | 78               |
|                                                | OCE    | 0           | 88             | 24                                | 112              |
|                                                | SAS    | 0           | 52             | 3                                 | 55               |
|                                                | SEA    | 0           | 84             | 3                                 | 86               |
|                                                | SSA    | 0           | 99             | 4                                 | 103              |
|                                                | USA    | 0           | 49             | 3                                 | 52               |

<sup>1</sup> The trade expansion cost reflects the cost of infrastructure and capacity constraints in the transport sector and is reset to zero after a decade if the traded quantity does not increase anymore. It is not present in the base year 2000.

**Supplementary Table 8 | Corn trade pattern in response to climate change (RCP8.5 scenarios under *Baseline trade*) at macro-region level.** Bilateral trade flows among 30 sub-regions are aggregated to reflect inter-regional trade among macro-regions and the magnitude of intra-regional trade. No climate change gives the trade volume (1000 ton) in the SSP2 baseline. Min and max CC impact give the minimum and maximum trade change (%) that occurs across RCP8.5 scenarios. Min and max CC new trade give the minimum and maximum trade volume (1000 ton) across RCP8.5 scenarios that is new compared to the SSP2 baseline.

| Exporter |                   | Importer |     |       |       |       |      |     |       |      |       |     |
|----------|-------------------|----------|-----|-------|-------|-------|------|-----|-------|------|-------|-----|
|          |                   | CAN      | CSI | EAS   | EUR   | LAC   | MNA  | OCE | SAS   | SEA  | SSA   | USA |
| CAN      | No climate change | 0        | 0   | 0     | 0     | 0     | 0    | 0   | 0     | 0    | 0     | 0   |
|          | Min CC impact (%) | 0%       | 0%  | 0%    | 0%    | 0%    | 0%   | 0%  | 0%    | 0%   | 0%    | 0%  |
|          | Max CC impact (%) | 0%       | 0%  | 0%    | 0%    | 0%    | 0%   | 0%  | 0%    | 0%   | 0%    | 0%  |
|          | Min CC new trade  | 0        | 0   | 0     | 0     | 45    | 0    | 0   | 0     | 0    | 0     | 0   |
|          | Max CC new trade  | 0        | 0   | 0     | 0     | 45    | 0    | 0   | 0     | 0    | 0     | 0   |
| CSI      | No climate change | 0        | 0   | 0     | 37    | 0     | 1393 | 0   | 0     | 0    | 0     | 0   |
|          | Min trade growth  | 0%       | 0%  | 0%    | -1%   | 0%    | 14%  | 0%  | 0%    | 0%   | 0%    | 0%  |
|          | Max trade growth  | 0%       | 0%  | 0%    | 221%  | 0%    | 106% | 0%  | 0%    | 0%   | 0%    | 0%  |
|          | Min new trade     | 0        | 0   | 0     | 0     | 0     | 0    | 0   | 0     | 0    | 0     | 0   |
|          | Max new trade     | 0        | 0   | 0     | 0     | 0     | 0    | 0   | 0     | 0    | 0     | 0   |
| EAS      | No climate change | 0        | 0   | 5357  | 0     | 0     | 0    | 0   | 0     | 8580 | 0     | 0   |
|          | Min trade growth  | 0%       | 0%  | -5%   | 0%    | 0%    | 0%   | 0%  | 0%    | -8%  | 0%    | 0%  |
|          | Max trade growth  | 0%       | 0%  | 22%   | 0%    | 0%    | 0%   | 0%  | 0%    | 113% | 0%    | 0%  |
|          | Min new trade     | 0        | 0   | 0     | 0     | 0     | 0    | 0   | 0     | 0    | 0     | 0   |
|          | Max new trade     | 0        | 0   | 0     | 0     | 0     | 0    | 0   | 0     | 0    | 0     | 0   |
| EUR      | No climate change | 0        | 0   | 2407  | 25938 | 0     | 2662 | 0   | 0     | 1773 | 0     | 0   |
|          | Min trade growth  | 0%       | 0%  | -25%  | -15%  | 0%    | 18%  | 0%  | 0%    | -4%  | 0%    | 0%  |
|          | Max trade growth  | 0%       | 0%  | 85%   | 13%   | 0%    | 127% | 0%  | 0%    | 114% | 0%    | 0%  |
|          | Min new trade     | 0        | 573 | 0     | 0     | 0     | 0    | 0   | 0     | 0    | 0     | 0   |
|          | Max new trade     | 0        | 573 | 660   | 0     | 0     | 1522 | 0   | 0     | 0    | 0     | 0   |
| LAC      | No climate change | 13643    | 0   | 0     | 10112 | 52812 | 7945 | 0   | 14776 | 4147 | 17419 | 0   |
|          | Min trade growth  | -71%     | 0%  | 0%    | 1%    | -2%   | 5%   | 0%  | -40%  | -64% | -37%  | 0%  |
|          | Max trade growth  | -41%     | 0%  | 0%    | 44%   | 8%    | 114% | 0%  | 222%  | 72%  | 4%    | 0%  |
|          | Min new trade     | 0        | 0   | 2069  | 0     | 0     | 0    | 0   | 0     | 0    | 0     | 0   |
|          | Max new trade     | 0        | 0   | 2151  | 0     | 0     | 0    | 0   | 0     | 0    | 0     | 0   |
| MNA      | No climate change | 0        | 0   | 0     | 14659 | 0     | 0    | 0   | 0     | 0    | 0     | 0   |
|          | Min trade growth  | 0%       | 0%  | 0%    | -59%  | 0%    | 0%   | 0%  | 0%    | 0%   | 0%    | 0%  |
|          | Max trade growth  | 0%       | 0%  | 0%    | -10%  | 0%    | 0%   | 0%  | 0%    | 0%   | 0%    | 0%  |
|          | Min new trade     | 0        | 0   | 0     | 0     | 0     | 336  | 0   | 0     | 0    | 0     | 0   |
|          | Max new trade     | 0        | 0   | 0     | 0     | 0     | 798  | 0   | 0     | 0    | 0     | 0   |
| OCE      | No climate change | 0        | 0   | 677   | 0     | 0     | 0    | 0   | 0     | 0    | 0     | 0   |
|          | Min trade growth  | 0%       | 0%  | -30%  | 0%    | 0%    | 0%   | 0%  | 0%    | 0%   | 0%    | 0%  |
|          | Max trade growth  | 0%       | 0%  | 9%    | 0%    | 0%    | 0%   | 0%  | 0%    | 0%   | 0%    | 0%  |
|          | Min new trade     | 0        | 0   | 0     | 0     | 0     | 0    | 2   | 0     | 130  | 0     | 0   |
|          | Max new trade     | 0        | 0   | 0     | 0     | 0     | 0    | 8   | 0     | 221  | 0     | 0   |
| SAS      | No climate change | 0        | 0   | 0     | 0     | 0     | 0    | 0   | 0     | 8393 | 0     | 0   |
|          | Min trade growth  | 0%       | 0%  | 0%    | 0%    | 0%    | 0%   | 0%  | 0%    | 12%  | 0%    | 0%  |
|          | Max trade growth  | 0%       | 0%  | 0%    | 0%    | 0%    | 0%   | 0%  | 0%    | 126% | 0%    | 0%  |
|          | Min new trade     | 0        | 0   | 0     | 0     | 0     | 0    | 0   | 0     | 0    | 0     | 0   |
|          | Max new trade     | 0        | 0   | 0     | 0     | 0     | 0    | 0   | 0     | 0    | 0     | 0   |
| SEA      | No climate change | 0        | 0   | 12015 | 0     | 0     | 0    | 0   | 0     | 0    | 0     | 0   |
|          | Min trade growth  | 0%       | 0%  | -16%  | 0%    | 0%    | 0%   | 0%  | 0%    | 0%   | 0%    | 0%  |
|          | Max trade growth  | 0%       | 0%  | 11%   | 0%    | 0%    | 0%   | 0%  | 0%    | 0%   | 0%    | 0%  |
|          | Min new trade     | 0        | 0   | 0     | 0     | 0     | 0    | 0   | 0     | 542  | 0     | 0   |
|          | Max new trade     | 0        | 0   | 0     | 0     | 0     | 0    | 0   | 0     | 3704 | 0     | 0   |

Supplementary Table 8 *continued*.

| Exporter |                   | Importer |     |       |      |      |       |      |       |      |      |     |
|----------|-------------------|----------|-----|-------|------|------|-------|------|-------|------|------|-----|
|          |                   | CAN      | CSI | EAS   | EUR  | LAC  | MNA   | OCE  | SAS   | SEA  | SSA  | USA |
| SSA      | No climate change | 0        | 0   | 21455 | 0    | 2548 | 13936 | 0    | 0     | 2033 | 0    | 0   |
|          | Min trade growth  | 0%       | 0%  | -49%  | 0%   | -84% | -93%  | 0%   | 0%    | 4%   | 0%   | 0%  |
|          | Max trade growth  | 0%       | 0%  | 8%    | 0%   | 49%  | -1%   | 0%   | 0%    | 169% | 0%   | 0%  |
|          | Min new trade     | 0        | 0   | 0     | 0    | 0    | 0     | 0    | 0     | 0    | 0    | 0   |
|          | Max new trade     | 0        | 0   | 517   | 0    | 0    | 0     | 0    | 0     | 0    | 0    | 0   |
| USA      | No climate change | 0        | 0   | 0     | 6131 | 1437 | 14442 | 491  | 97388 | 0    | 4382 | 0   |
|          | Min trade growth  | 0%       | 0%  | 0%    | -99% | 4%   | -15%  | 0%   | -88%  | 0%   | -75% | 0%  |
|          | Max trade growth  | 0%       | 0%  | 0%    | 90%  | 738% | 35%   | 132% | 36%   | 0%   | 107% | 0%  |
|          | Min new trade     | 5669     | 0   | 10516 | 0    | 0    | 0     | 0    | 0     | 91   | 0    | 0   |
|          | Max new trade     | 5669     | 0   | 10516 | 0    | 4865 | 0     | 0    | 537   | 3343 | 165  | 0   |



**Supplementary Table 9 | Rice trade pattern in response to climate change (RCP8.5 scenarios under *Baseline trade*) at macro-region level.** Bilateral trade flows among 30 sub-regions are aggregated to reflect inter-regional trade among macro-regions and the magnitude of intra-regional trade. No climate change gives the trade volume (1000 ton) in the SSP2 baseline. Min and max CC impact give the minimum and maximum trade change (%) that occurs across RCP8.5 scenarios. Min and max CC new trade give the minimum and maximum trade volume (1000 ton) across RCP8.5 scenarios that is new compared to the SSP2 baseline.

| Exporter |                   | Importer |     |       |      |      |       |      |       |      |       |      |
|----------|-------------------|----------|-----|-------|------|------|-------|------|-------|------|-------|------|
|          |                   | CAN      | CSI | EAS   | EUR  | LAC  | MNA   | OCE  | SAS   | SEA  | SSA   | USA  |
| EAS      | No climate change | 0        | 0   | 0     | 0    | 170  | 33    | 0    | 0     | 630  | 71663 | 0    |
|          | Min trade growth  | 0%       | 0%  | 0%    | 0%   | -6%  | -6%   | 0%   | 0%    | 0%   | -3%   | 0%   |
|          | Max trade growth  | 0%       | 0%  | 0%    | 0%   | 7%   | 11%   | 0%   | 0%    | 170% | 1%    | 0%   |
|          | Min new trade     | 0        | 0   | 0     | 0    | 0    | 0     | 0    | 0     | 0    | 0     | 0    |
|          | Max new trade     | 0        | 0   | 0     | 0    | 0    | 0     | 0    | 0     | 0    | 0     | 0    |
| EUR      | No climate change | 619      | 0   | 0     | 316  | 5554 | 17432 | 0    | 0     | 0    | 2304  | 0    |
|          | Min trade growth  | 0%       | 0%  | 0%    | -75% | -70% | -39%  | 0%   | 0%    | 0%   | -16%  | 0%   |
|          | Max trade growth  | 0%       | 0%  | 0%    | -6%  | 5%   | 2%    | 0%   | 0%    | 0%   | 57%   | 0%   |
|          | Min new trade     | 0        | 0   | 0     | 0    | 0    | 0     | 0    | 0     | 0    | 0     | 0    |
|          | Max new trade     | 0        | 0   | 0     | 0    | 0    | 1     | 0    | 0     | 0    | 0     | 0    |
| LAC      | No climate change | 0        | 0   | 0     | 2805 | 6730 | 743   | 0    | 0     | 0    | 834   | 0    |
|          | Min trade growth  | 0%       | 0%  | 0%    | 2%   | -8%  | -15%  | 0%   | 0%    | 0%   | -3%   | 0%   |
|          | Max trade growth  | 0%       | 0%  | 0%    | 104% | 24%  | 73%   | 0%   | 0%    | 0%   | 125%  | 0%   |
|          | Min new trade     | 0        | 0   | 0     | 0    | 0    | 0     | 0    | 0     | 0    | 0     | 0    |
|          | Max new trade     | 0        | 0   | 0     | 296  | 0    | 0     | 0    | 0     | 0    | 640   | 0    |
| MNA      | No climate change | 0        | 0   | 0     | 1255 | 0    | 0     | 0    | 0     | 0    | 0     | 0    |
|          | Min trade growth  | 0%       | 0%  | 0%    | -33% | 0%   | 0%    | 0%   | 0%    | 0%   | 0%    | 0%   |
|          | Max trade growth  | 0%       | 0%  | 0%    | 0%   | 0%   | 0%    | 0%   | 0%    | 0%   | 0%    | 0%   |
|          | Min new trade     | 0        | 0   | 0     | 0    | 0    | 0     | 0    | 0     | 0    | 0     | 0    |
|          | Max new trade     | 0        | 0   | 0     | 0    | 0    | 0     | 0    | 0     | 0    | 0     | 0    |
| OCE      | No climate change | 0        | 0   | 0     | 290  | 0    | 0     | 0    | 0     | 0    | 0     | 0    |
|          | Min trade growth  | 0%       | 0%  | 0%    | -7%  | 0%   | 0%    | 0%   | 0%    | 0%   | 0%    | 0%   |
|          | Max trade growth  | 0%       | 0%  | 0%    | 17%  | 0%   | 0%    | 0%   | 0%    | 0%   | 0%    | 0%   |
|          | Min new trade     | 0        | 0   | 0     | 0    | 0    | 0     | 0    | 0     | 0    | 0     | 0    |
|          | Max new trade     | 0        | 0   | 0     | 0    | 0    | 0     | 0    | 0     | 0    | 0     | 0    |
| SAS      | No climate change | 0        | 88  | 0     | 1525 | 0    | 1957  | 175  | 0     | 9038 | 1098  | 0    |
|          | Min trade growth  | 0%       | 0%  | 0%    | -7%  | 0%   | -97%  | -59% | 0%    | -18% | -79%  | 0%   |
|          | Max trade growth  | 0%       | 0%  | 0%    | 8%   | 0%   | 5%    | 111% | 0%    | 287% | 4%    | 0%   |
|          | Min new trade     | 0        | 0   | 0     | 0    | 0    | 0     | 0    | 0     | 0    | 0     | 0    |
|          | Max new trade     | 0        | 0   | 0     | 0    | 0    | 0     | 0    | 0     | 0    | 0     | 0    |
| SEA      | No climate change | 0        | 0   | 78592 | 939  | 0    | 0     | 294  | 54530 | 0    | 414   | 3097 |
|          | Min trade growth  | 0%       | 0%  | -3%   | -41% | 0%   | 0%    | -49% | -23%  | 0%   | -21%  | -60% |
|          | Max trade growth  | 0%       | 0%  | 1%    | 6%   | 0%   | 0%    | 18%  | 12%   | 0%   | 6%    | 486% |
|          | Min new trade     | 0        | 0   | 0     | 0    | 0    | 1     | 0    | 0     | 0    | 0     | 0    |
|          | Max new trade     | 0        | 0   | 0     | 104  | 0    | 84    | 0    | 0     | 0    | 0     | 0    |
| SSA      | No climate change | 0        | 0   | 0     | 119  | 58   | 0     | 0    | 0     | 0    | 58    | 0    |
|          | Min trade growth  | 0%       | 0%  | 0%    | -15% | -17% | 0%    | 0%   | 0%    | 0%   | -17%  | 0%   |
|          | Max trade growth  | 0%       | 0%  | 0%    | 3%   | 5%   | 0%    | 0%   | 0%    | 0%   | 1%    | 0%   |
|          | Min new trade     | 0        | 0   | 0     | 0    | 0    | 0     | 0    | 0     | 0    | 0     | 0    |
|          | Max new trade     | 0        | 0   | 0     | 0    | 0    | 0     | 0    | 0     | 0    | 0     | 0    |

Supplementary Table 9 *continued*.

| Exporter |                   | Importer |     |     |       |     |     |     |     |     |     |     |
|----------|-------------------|----------|-----|-----|-------|-----|-----|-----|-----|-----|-----|-----|
|          |                   | CAN      | CSI | EAS | EUR   | LAC | MNA | OCE | SAS | SEA | SSA | USA |
| USA      | No climate change | 0        | 0   | 0   | 24310 | 0   | 0   | 0   | 0   | 0   | 0   | 0   |
|          | Min trade growth  | 0%       | 0%  | 0%  | -49%  | 0%  | 0%  | 0%  | 0%  | 0%  | 0%  | 0%  |
|          | Max trade growth  | 0%       | 0%  | 0%  | -5%   | 0%  | 0%  | 0%  | 0%  | 0%  | 0%  | 0%  |
|          | Min new trade     | 0        | 0   | 0   | 0     | 0   | 0   | 108 | 0   | 0   | 0   | 0   |
|          | Max new trade     | 0        | 0   | 0   | 369   | 0   | 0   | 108 | 0   | 0   | 0   | 0   |

**Supplementary Table 10 | Wheat trade pattern in response to climate change (RCP8.5 scenarios under *Baseline trade*) at macro-region level.** Bilateral trade flows among 30 sub-regions are aggregated to reflect inter-regional trade among macro-regions and the magnitude of intra-regional trade. No climate change gives the trade volume (1000 ton) in the SSP2 baseline. Min and max CC impact give the minimum and maximum trade change (%) that occurs across RCP8.5 scenarios. Min and max CC new trade give the minimum and maximum trade volume (1000 ton) across RCP8.5 scenarios that is new compared to the SSP2 baseline.

| Exporter |                   | Importer |      |      |       |       |       |     |       |       |       |      |
|----------|-------------------|----------|------|------|-------|-------|-------|-----|-------|-------|-------|------|
|          |                   | CAN      | CSI  | EAS  | EUR   | LAC   | MNA   | OCE | SAS   | SEA   | SSA   | USA  |
| CAN      | No climate change | 0        | 0    | 5961 | 0     | 1056  | 0     | 0   | 0     | 0     | 2503  | 8185 |
|          | Min trade growth  | 0%       | 0%   | -1%  | 0%    | 67%   | 0%    | 0%  | 0%    | 0%    | -48%  | 126% |
|          | Max trade growth  | 0%       | 0%   | 0%   | 0%    | 67%   | 0%    | 0%  | 0%    | 0%    | -48%  | 262% |
|          | Min new trade     | 0        | 0    | 0    | 0     | 0     | 0     | 0   | 0     | 0     | 0     | 0    |
|          | Max new trade     | 0        | 0    | 0    | 0     | 0     | 0     | 0   | 0     | 0     | 0     | 0    |
| CSI      | No climate change | 0        | 0    | 1733 | 4391  | 0     | 11553 | 0   | 0     | 0     | 0     | 0    |
|          | Min trade growth  | 0%       | 0%   | -35% | -73%  | 0%    | -27%  | 0%  | 0%    | 0%    | 0%    | 0%   |
|          | Max trade growth  | 0%       | 0%   | 125% | 153%  | 0%    | 60%   | 0%  | 0%    | 0%    | 0%    | 0%   |
|          | Min new trade     | 0        | 0    | 0    | 0     | 0     | 0     | 0   | 0     | 0     | 0     | 0    |
|          | Max new trade     | 0        | 0    | 0    | 5872  | 0     | 0     | 0   | 0     | 0     | 0     | 0    |
| EAS      | No climate change | 0        | 0    | 4600 | 0     | 0     | 0     | 0   | 0     | 0     | 0     | 0    |
|          | Min trade growth  | 0%       | 0%   | -47% | 0%    | 0%    | 0%    | 0%  | 0%    | 0%    | 0%    | 0%   |
|          | Max trade growth  | 0%       | 0%   | 13%  | 0%    | 0%    | 0%    | 0%  | 0%    | 0%    | 0%    | 0%   |
|          | Min new trade     | 0        | 0    | 0    | 0     | 0     | 0     | 0   | 0     | 0     | 0     | 0    |
|          | Max new trade     | 0        | 0    | 0    | 0     | 0     | 0     | 0   | 0     | 0     | 0     | 0    |
| EUR      | No climate change | 0        | 360  | 42   | 13319 | 13222 | 2456  | 0   | 0     | 14637 | 18336 | 0    |
|          | Min trade growth  | 0%       | -68% | 438% | -45%  | 66%   | -4%   | 0%  | 0%    | -2%   | 12%   | 0%   |
|          | Max trade growth  | 0%       | 54%  | 593% | 37%   | 74%   | 410%  | 0%  | 0%    | 1%    | 34%   | 0%   |
|          | Min new trade     | 0        | 0    | 0    | 0     | 0     | 0     | 0   | 112   | 0     | 0     | 0    |
|          | Max new trade     | 0        | 0    | 7    | 0     | 0     | 0     | 0   | 602   | 0     | 0     | 0    |
| LAC      | No climate change | 0        | 0    | 0    | 0     | 0     | 6930  | 0   | 515   | 0     | 2156  | 0    |
|          | Min trade growth  | 0%       | 0%   | 0%   | 0%    | 0%    | -17%  | 0%  | 1%    | 0%    | 3%    | 0%   |
|          | Max trade growth  | 0%       | 0%   | 0%   | 0%    | 0%    | 49%   | 0%  | 157%  | 0%    | 26%   | 0%   |
|          | Min new trade     | 0        | 75   | 0    | 0     | 0     | 0     | 0   | 0     | 0     | 0     | 0    |
|          | Max new trade     | 0        | 75   | 0    | 0     | 0     | 0     | 0   | 2     | 0     | 0     | 0    |
| MNA      | No climate change | 0        | 0    | 0    | 18500 | 0     | 0     | 0   | 0     | 0     | 12649 | 0    |
|          | Min trade growth  | 0%       | 0%   | 0%   | 58%   | 0%    | 0%    | 0%  | 0%    | 0%    | 19%   | 0%   |
|          | Max trade growth  | 0%       | 0%   | 0%   | 80%   | 0%    | 0%    | 0%  | 0%    | 0%    | 42%   | 0%   |
|          | Min new trade     | 0        | 0    | 0    | 0     | 0     | 1085  | 0   | 0     | 0     | 0     | 0    |
|          | Max new trade     | 0        | 0    | 0    | 0     | 0     | 1085  | 0   | 0     | 0     | 1466  | 0    |
| OCE      | No climate change | 0        | 0    | 0    | 0     | 0     | 0     | 228 | 59506 | 0     | 0     | 0    |
|          | Min trade growth  | 0%       | 0%   | 0%   | 0%    | 0%    | 0%    | -5% | -11%  | 0%    | 0%    | 0%   |
|          | Max trade growth  | 0%       | 0%   | 0%   | 0%    | 0%    | 0%    | 0%  | 39%   | 0%    | 0%    | 0%   |
|          | Min new trade     | 0        | 0    | 0    | 0     | 0     | 0     | 0   | 0     | 0     | 0     | 0    |
|          | Max new trade     | 0        | 0    | 0    | 0     | 0     | 0     | 0   | 0     | 0     | 0     | 0    |
| SAS      | No climate change | 0        | 0    | 0    | 0     | 0     | 0     | 0   | 5711  | 0     | 0     | 0    |
|          | Min trade growth  | 0%       | 0%   | 0%   | 0%    | 0%    | 0%    | 0%  | -57%  | 0%    | 0%    | 0%   |
|          | Max trade growth  | 0%       | 0%   | 0%   | 0%    | 0%    | 0%    | 0%  | 40%   | 0%    | 0%    | 0%   |
|          | Min new trade     | 0        | 0    | 0    | 0     | 0     | 0     | 0   | 0     | 0     | 0     | 0    |
|          | Max new trade     | 0        | 0    | 0    | 0     | 0     | 0     | 0   | 0     | 0     | 0     | 0    |
| SEA      | No climate change | 0        | 0    | 3    | 0     | 0     | 0     | 0   | 0     | 63    | 4     | 0    |
|          | Min trade growth  | 0%       | 0%   | 9%   | 0%    | 0%    | 0%    | 0%  | 0%    | 25%   | -52%  | 0%   |
|          | Max trade growth  | 0%       | 0%   | 66%  | 0%    | 0%    | 0%    | 0%  | 0%    | 125%  | 12%   | 0%   |
|          | Min new trade     | 0        | 0    | 0    | 0     | 0     | 0     | 0   | 0     | 0     | 0     | 0    |
|          | Max new trade     | 0        | 0    | 0    | 0     | 0     | 0     | 0   | 0     | 0     | 0     | 0    |

Supplementary Table 10 *continued*.

| Exporter   |                   | Importer |      |     |      |      |     |     |       |     |       |     |
|------------|-------------------|----------|------|-----|------|------|-----|-----|-------|-----|-------|-----|
|            |                   | CAN      | CSI  | EAS | EUR  | LAC  | MNA | OCE | SAS   | SEA | SSA   | USA |
| <b>SSA</b> | No climate change | 0        | 2    | 3   | 4    | 1    | 1   | 8   | 1     | 0   | 4     | 0   |
|            | Min trade growth  | 0%       | -58% | -2% | -80% | -26% | 43% | -8% | 51%   | 0%  | -28%  | 0%  |
|            | Max trade growth  | 0%       | 13%  | 51% | 96%  | 68%  | 51% | 59% | 480%  | 0%  | 1394% | 0%  |
|            | Min new trade     | 0        | 0    | 0   | 0    | 0    | 0   | 0   | 2     | 0   | 0     | 0   |
|            | Max new trade     | 0        | 0    | 0   | 2    | 0    | 0   | 0   | 3     | 0   | 58    | 0   |
| <b>USA</b> | No climate change | 0        | 0    | 0   | 0    | 0    | 0   | 0   | 21859 | 0   | 0     | 0   |
|            | Min trade growth  | 0%       | 0%   | 0%  | 0%   | 0%   | 0%  | 0%  | -99%  | 0%  | 0%    | 0%  |
|            | Max trade growth  | 0%       | 0%   | 0%  | 0%   | 0%   | 0%  | 0%  | -36%  | 0%  | 0%    | 0%  |
|            | Min new trade     | 0        | 0    | 0   | 0    | 0    | 0   | 0   | 0     | 0   | 0     | 0   |
|            | Max new trade     | 0        | 0    | 0   | 0    | 0    | 0   | 0   | 0     | 0   | 0     | 0   |

**Supplementary Table 11 | Soya trade pattern in response to climate change (RCP8.5 scenarios under *Baseline trade*) at macro-region level.** Bilateral trade flows among 30 sub-regions are aggregated to reflect inter-regional trade among macro-regions and the magnitude of intra-regional trade. No climate change gives the trade volume (1000 ton) in the SSP2 baseline. Min and max CC impact give the minimum and maximum trade change (%) that occurs across RCP8.5 scenarios. Min and max CC new trade give the minimum and maximum trade volume (1000 ton) across RCP8.5 scenarios that is new compared to the SSP2 baseline.

| Exporter |                   | Importer |       |       |       |       |       |      |       |       |       |     |
|----------|-------------------|----------|-------|-------|-------|-------|-------|------|-------|-------|-------|-----|
|          |                   | CAN      | CSI   | EAS   | EUR   | LAC   | MNA   | OCE  | SAS   | SEA   | SSA   | USA |
| CAN      | No climate change | 0        | 0     | 3994  | 160   | 0     | 0     | 0    | 0     | 437   | 0     | 0   |
|          | Min trade growth  | 0%       | 0%    | -10%  | -14%  | 0%    | 0%    | 0%   | 0%    | 0%    | 0%    | 0%  |
|          | Max trade growth  | 0%       | 0%    | 11%   | 2%    | 0%    | 0%    | 0%   | 0%    | 15%   | 0%    | 0%  |
|          | Min new trade     | 0        | 0     | 0     | 0     | 0     | 0     | 0    | 0     | 0     | 0     | 1   |
|          | Max new trade     | 0        | 0     | 0     | 0     | 0     | 0     | 0    | 0     | 0     | 0     | 1   |
| CSI      | No climate change | 0        | 0     | 16418 | 0     | 0     | 0     | 0    | 0     | 0     | 0     | 0   |
|          | Min trade growth  | 0%       | 0%    | -1%   | 0%    | 0%    | 0%    | 0%   | 0%    | 0%    | 0%    | 0%  |
|          | Max trade growth  | 0%       | 0%    | 12%   | 0%    | 0%    | 0%    | 0%   | 0%    | 0%    | 0%    | 0%  |
|          | Min new trade     | 0        | 0     | 0     | 0     | 0     | 0     | 0    | 0     | 0     | 0     | 0   |
|          | Max new trade     | 0        | 0     | 0     | 0     | 0     | 0     | 0    | 0     | 0     | 0     | 0   |
| EAS      | No climate change | 0        | 0     | 1294  | 0     | 0     | 0     | 0    | 0     | 0     | 0     | 0   |
|          | Min trade growth  | 0%       | 0%    | -33%  | 0%    | 0%    | 0%    | 0%   | 0%    | 0%    | 0%    | 0%  |
|          | Max trade growth  | 0%       | 0%    | -1%   | 0%    | 0%    | 0%    | 0%   | 0%    | 0%    | 0%    | 0%  |
|          | Min new trade     | 0        | 0     | 0     | 0     | 0     | 0     | 0    | 0     | 0     | 3     | 0   |
|          | Max new trade     | 0        | 0     | 6     | 0     | 0     | 0     | 0    | 0     | 0     | 3     | 0   |
| EUR      | No climate change | 0        | 10313 | 6171  | 8137  | 1199  | 908   | 910  | 0     | 7088  | 2999  | 0   |
|          | Min trade growth  | 0%       | 3%    | -73%  | 26%   | -7%   | 0%    | -40% | 0%    | 16%   | -1%   | 0%  |
|          | Max trade growth  | 0%       | 10%   | -63%  | 64%   | 208%  | 19%   | 21%  | 0%    | 60%   | 23%   | 0%  |
|          | Min new trade     | 0        | 0     | 0     | 0     | 0     | 0     | 0    | 0     | 0     | 0     | 0   |
|          | Max new trade     | 0        | 0     | 0     | 465   | 3     | 0     | 0    | 0     | 0     | 145   | 0   |
| LAC      | No climate change | 5375     | 1029  | 50840 | 59989 | 22140 | 23805 | 217  | 18666 | 14279 | 835   | 0   |
|          | Min trade growth  | -29%     | -55%  | 8%    | -7%   | -22%  | -5%   | -8%  | 46%   | 3%    | -30%  | 0%  |
|          | Max trade growth  | 67%      | 12%   | 13%   | 13%   | 4%    | 9%    | 13%  | 89%   | 26%   | -1%   | 0%  |
|          | Min new trade     | 0        | 0     | 0     | 0     | 0     | 0     | 0    | 249   | 0     | 0     | 0   |
|          | Max new trade     | 0        | 0     | 382   | 0     | 1     | 0     | 1    | 1327  | 0     | 2     | 0   |
| MNA      | No climate change | 0        | 4033  | 0     | 0     | 0     | 0     | 0    | 0     | 0     | 0.08  | 0   |
|          | Min trade growth  | 0%       | 9%    | 0%    | 0%    | 0%    | 0%    | 0%   | 0%    | 0%    | 478%  | 0%  |
|          | Max trade growth  | 0%       | 22%   | 0%    | 0%    | 0%    | 0%    | 0%   | 0%    | 0%    | 1256% | 0%  |
|          | Min new trade     | 0        | 0     | 0     | 0     | 0     | 0     | 0    | 276   | 0     | 0     | 0   |
|          | Max new trade     | 0        | 0     | 0     | 0     | 1     | 0     | 0    | 593   | 0     | 0     | 0   |
| OCE      | No climate change | 0        | 0     | 42    | 0     | 0     | 0     | 0    | 0     | 675   | 0     | 0   |
|          | Min trade growth  | 0%       | 0%    | 0%    | 0%    | 0%    | 0%    | 0%   | 0%    | 7%    | 0%    | 0%  |
|          | Max trade growth  | 0%       | 0%    | 33%   | 0%    | 0%    | 0%    | 0%   | 0%    | 28%   | 0%    | 0%  |
|          | Min new trade     | 0        | 0     | 0     | 0     | 0     | 0     | 0    | 23    | 0     | 0     | 0   |
|          | Max new trade     | 0        | 0     | 0     | 0     | 1     | 0     | 0    | 45    | 0     | 0     | 0   |
| SAS      | No climate change | 0        | 0     | 173   | 0     | 1     | 0     | 0    | 9068  | 4110  | 0     | 0   |
|          | Min trade growth  | 0%       | 0%    | -10%  | 0%    | -38%  | 0%    | 0%   | -35%  | -23%  | 0%    | 0%  |
|          | Max trade growth  | 0%       | 0%    | 206%  | 0%    | 117%  | 0%    | 0%   | -19%  | 8%    | 0%    | 0%  |
|          | Min new trade     | 0        | 0     | 0     | 0     | 0     | 0     | 0    | 0     | 0     | 0     | 0   |
|          | Max new trade     | 0        | 0     | 0     | 0     | 0     | 0     | 0    | 0     | 0     | 0     | 0   |
| SEA      | No climate change | 0        | 0     | 7     | 0     | 0     | 0     | 0    | 0     | 1546  | 0     | 0   |
|          | Min trade growth  | 0%       | 0%    | -6%   | 0%    | 0%    | 0%    | 0%   | 0%    | -11%  | 0%    | 0%  |
|          | Max trade growth  | 0%       | 0%    | 297%  | 0%    | 0%    | 0%    | 0%   | 0%    | 26%   | 0%    | 0%  |
|          | Min new trade     | 0        | 0     | 0     | 0     | 0     | 0     | 0    | 0     | 0     | 0     | 0   |
|          | Max new trade     | 0        | 0     | 11    | 0     | 0     | 0     | 0    | 0     | 0     | 0     | 0   |

Supplementary Table 11 *continued*.

| Exporter |                   | Importer |     |      |      |      |       |     |      |      |      |     |
|----------|-------------------|----------|-----|------|------|------|-------|-----|------|------|------|-----|
|          |                   | CAN      | CSI | EAS  | EUR  | LAC  | MNA   | OCE | SAS  | SEA  | SSA  | USA |
| SSA      | No climate change | 0        | 0   | 0    | 0    | 0    | 0     | 0   | 0    | 0    | 546  | 0   |
|          | Min trade growth  | 0%       | 0%  | 0%   | 0%   | 0%   | 0%    | 0%  | 0%   | 0%   | -9%  | 0%  |
|          | Max trade growth  | 0%       | 0%  | 0%   | 0%   | 0%   | 0%    | 0%  | 0%   | 0%   | 54%  | 0%  |
|          | Min new trade     | 0        | 0   | 0    | 0    | 0    | 0     | 0   | 0    | 0    | 0    | 0   |
|          | Max new trade     | 0        | 0   | 0    | 0    | 0    | 0     | 0   | 0    | 0    | 0    | 0   |
| USA      | No climate change | 0        | 0   | 607  | 1235 | 5111 | 284   | 0   | 1333 | 7385 | 279  | 0   |
|          | Min trade growth  | 0%       | 0%  | -61% | -58% | -40% | 1162% | 0%  | -67% | -61% | 102% | 0%  |
|          | Max trade growth  | 0%       | 0%  | 3%   | 28%  | 8%   | 1162% | 0%  | 89%  | 26%  | 102% | 0%  |
|          | Min new trade     | 1983     | 0   | 0    | 0    | 0    | 3374  | 472 | 0    | 0    | 188  | 0   |
|          | Max new trade     | 1983     | 0   | 0    | 340  | 0    | 3374  | 472 | 0    | 264  | 188  | 0   |

Supplementary Table 12 | Technology-induced exogenous crop yield growth rates between 2000 and 2050 under SSP2.

| Region | All crops | Corn | Rice | Soya | Wheat |
|--------|-----------|------|------|------|-------|
| USA    | 34%       | 39%  | 42%  | 35%  | 18%   |
| CAN    | 36%       | 45%  | 0%   | 13%  | 43%   |
| EUR    | 44%       | 66%  | 17%  | 37%  | 39%   |
| CSI    | 110%      | 123% | 128% | 87%  | 111%  |
| EAS    | 45%       | 49%  | 32%  | 36%  | 68%   |
| SEA    | 67%       | 140% | 60%  | 64%  | 166%  |
| SAS    | 93%       | 137% | 117% | 98%  | 86%   |
| MNA    | 77%       | 124% | 66%  | 56%  | 75%   |
| SSA    | 114%      | 185% | 108% | 154% | 56%   |
| LAC    | 86%       | 172% | 96%  | 63%  | 106%  |
| OCE    | 47%       | 56%  | 30%  | 34%  | 67%   |

## Supplementary Text

### Contribution to existing literature

To determine whether international trade can act as an adaptation mechanism to climate change, global simulation studies assess whether for a particular indicator, the outcome under climate change is worse under a restricted trade setting or better under a liberalized trade setting. Supplementary Table 13 presents an overview of the trade and climate change scenarios assessed in recent literature. Most studies focus on either trade liberalization or trade restriction, or do not compare the impact of trade under climate change to the impact of trade under current climate. By analyzing a comprehensive set of both trade and climate change scenarios, this paper intends to contribute to this research gap and investigates whether the impact of trade becomes larger under climate change.

Supplementary Fig. 5 compares the results in this paper to previous simulation studies. It reveals that there is an agreement on the direction of the impact of trade: trade restriction worsens the adverse impact of climate change on agricultural GDP, prices or risk of hunger, while trade integration alleviates it. It further shows that our scenarios identify a wider range of impacts compared to previous literature. For example, we find that trade restriction increases the adverse impact of climate change on food prices by 40% to 90%, compared to 63% in Wiebe et al<sup>3</sup>, or that trade integration reduces the adverse impact of climate change on hunger by 11% to 64%, compared to 44% in Baldos and Hertel<sup>4</sup> (Supplementary Fig. 5).

**Supplementary Table 13 | Comparison of global simulation studies<sup>3–9</sup> on climate change adaptation in the agricultural sector through international trade.** Overview of scenarios assessed: restricted (T\_FIX) or liberalized (T\_LIB) trade, under current climate (No CC) or climate change (CC).

| Paper                     | Indicator            | Economic model                         | Climate change scenarios                                                           | No CC | No CC + T_FIX | No CC + T_LIB | CC | CC + T_FIX | CC + T_LIB | Trade scenarios                                                                                                                                |
|---------------------------|----------------------|----------------------------------------|------------------------------------------------------------------------------------|-------|---------------|---------------|----|------------|------------|------------------------------------------------------------------------------------------------------------------------------------------------|
| Randhir and Hertel (2000) | Equivalent Variation | GTAP                                   | Crop yield distribution from Tsigas et al. (1997)                                  |       |               |               | x  | x          | x          | T_FIX: market insulation<br>T_LIB: removal of all agricultural trade distortions and producer subsidies                                        |
| Costinot et al. (2016)    | Agr. GDP             | Static CGE                             | SRES A1F1 (~RCP8.5) with CO <sub>2</sub>                                           | x     |               |               | x  | x          |            | T_FIX: fixed export share<br>T_LIB: /                                                                                                          |
| Stevanovic et al. (2016)  | Agr. GDP, prices     | MagPIE                                 | RCP8.5 without CO <sub>2</sub>                                                     |       | x             | x             |    | x          | x          | T_FIX: relative share of regional trade is fixed to the level of 1995<br>T_LIB: reduce trade barriers by 10% per decade                        |
| Gouel and Laborde (2018)  | Agr. GDP             | Static CGE                             | SRES A1F1 (~RCP8.5) with CO <sub>2</sub>                                           | x     |               |               | x  | x          | x          | T_FIX: fixed import share or fixed export share<br>T_LIB: integrated world markets                                                             |
| Baldos and Hertel (2015)  | Hunger               | SIMPLE                                 | RCP8.5 without CO <sub>2</sub>                                                     |       |               |               | x  |            | x          | T_FIX: /<br>T_LIB: integrated world market                                                                                                     |
| Wiebe et al. (2015)       | Prices               | ENVISAGE, FARM, IMPACT, MAGNET, MAgPIE | RCP4.5, RCP6, RCP8.5 without CO <sub>2</sub>                                       | x     |               |               | x  | x          | x          | T_FIX: tariffs between macro-regions doubled<br>T_LIB: removal of tariffs and export subsidies on agri-food trade (phased out over 2020–2035). |
| Cui et al. (2018)         | GDP, prices, ...     | MAGNET                                 | RCP6 without CO <sub>2</sub>                                                       | x     |               | x             | x  |            | x          | T_FIX: /<br>T_LIB: removal of import tariffs, export taxes and export subsidies.                                                               |
| This paper                | Hunger, prices       | GLOBIOM                                | RCP2.6, RCP4.5, RCP6, RCP8.5 with CO <sub>2</sub> + RCP8.5 without CO <sub>2</sub> | x     | x             | x             | x  | x          | x          | T_FIX: fixed max. import volume or pre-Doha tariff levels<br>T_LIB: removal of tariffs on agricultural trade, trade facilitation or both       |



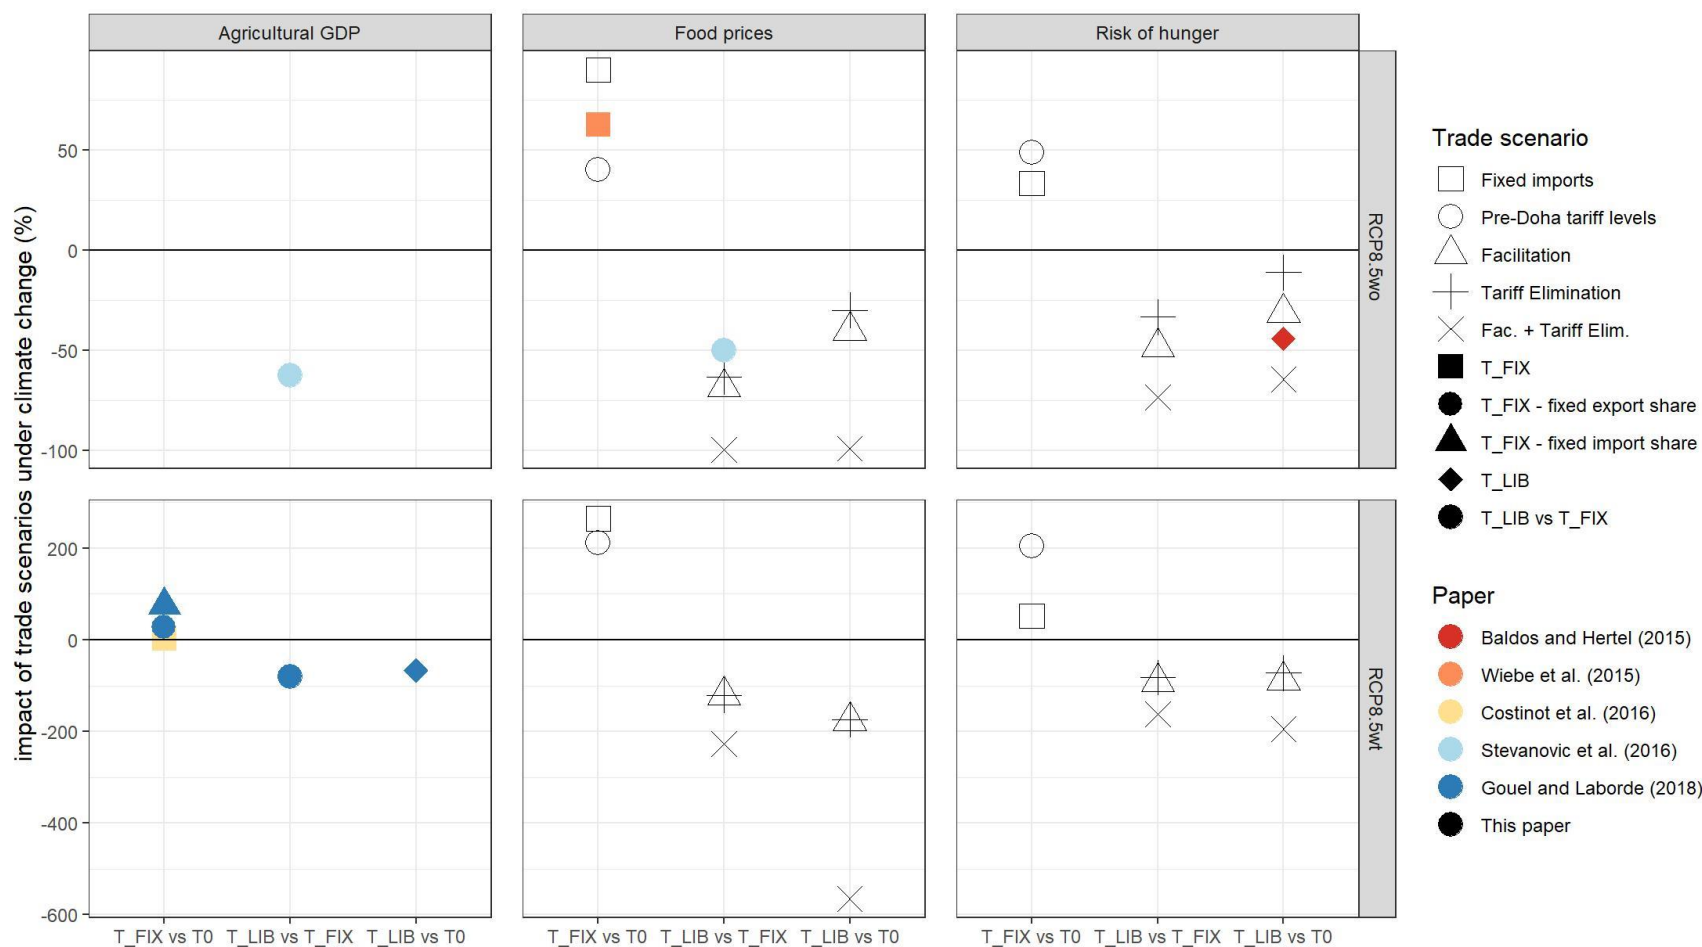

**Supplementary Fig. 5 | Comparison of literature on climate change adaptation in agricultural sector through international trade: impact of restricted (T\_FIX) or liberalized (T\_LIB) trade compared to baseline trade scenario (T0) under RCP8.5 with (wt) or without (wo) CO<sub>2</sub> fertilization.** T\_FIX vs T0 indicates how restricting trade alters the impact climate change ( $\frac{\text{Impact CC under } T\_FIX}{\text{Impact CC under } T0} - 1$ ). T\_LIB vs T0 gives the impact of liberalizing or facilitating trade on climate change effects ( $1 - \frac{\text{Impact CC under } T\_LIB}{\text{Impact CC under } T0}$ ). T\_FIX vs T\_LIB compares the impact of restricting trade compared to open trade under climate change ( $1 - \frac{\text{Impact CC under } T\_LIB}{\text{Impact CC under } T\_FIX}$ ). For details on the restricted (T\_FIX) and liberalized (T\_LIB) trade scenarios of each paper, see Supplementary Table 13.

## Comparative advantage analysis

Ricardo's theory of comparative advantage postulates that a country has a comparative advantage if the opportunity cost of producing a certain good in terms of other goods is smaller than it is in other countries<sup>10</sup>. Trade benefits countries when they export goods for which they have a comparative advantage through gains in efficiency and consumption possibilities. Less resources are needed for the same level of consumption, or equivalently, a higher consumption level can be reached for the same amount of resources. Our indicators of comparative advantage are inspired by the application of Ricardo's trade theory to a multi-country multi-good setting by Costinot et al.<sup>11</sup>. They propose that when trade barriers are removed, a country should not produce and export only the goods for which it has a comparative advantage, but it should produce and export relatively more of these goods. Using linear regression models, we estimate whether trade cost reduction increases the share of production of a crop that region represents in total world production of the crop (Fig. 4 in main text), the share of each crop in a region's total crop production (Supplementary Fig. 6), and the share of a region's production that is exported (Supplementary Fig. 7). Production and export effects mostly correspond, but there are some cases where reduced trade costs increase export shares without corresponding increases in production shares, e.g. corn in CSI and EUR, or wheat in CAN. These specialization indicators take into account differences in land productivity, land endowment and competitiveness between crops and regions.

As a robustness check, we report additional indicators of comparative advantage that are common in the literature. The original definition of comparative advantage in the Ricardo trade model states that "A country has a comparative advantage in producing a good if the opportunity cost of producing that good in terms of other goods is lower in that country than it is in other countries." (Krugman and Obstfeld<sup>10</sup> p. 14). The assessment of comparative advantages requires tackling the fundamental identification problem of unobserved relative productivity differences across countries under complete specialization<sup>12</sup>. Costinot and Donaldson<sup>13</sup> demonstrate that the identification problem can be solved in the context of agricultural production by using agronomic predictions of crop yields in each country. They define comparative advantage in terms of the relative crop yield (productivity  $A_{cf}^g$ ) between two crops (goods  $g$ ) and two fields (factors  $f$ ): "If two factors located in country  $c$  are such that  $(\frac{A_{cf_2}^{g_2}}{A_{cf_2}^{g_1}} > \frac{A_{cf_1}^{g_2}}{A_{cf_1}^{g_1}})$  for two goods  $g_1$  and  $g_2$ , then field  $f_2$  has a comparative advantage in good  $g_2$ ". We use a similar measure, but perform a cross-region comparison with for each crop the ratio of yield to the average yield of all other crops (Supplementary Fig. 8). A second related indicator is the relative competitiveness across crops and regions. GLOBIOM is a perfect competition model implying that producer prices reflect marginal costs. By comparing for each region and crop its producer price to the world average price and regional average crop price, we assess to what extent a region can produce a certain crop at a lower cost compared to other regions and compared to other crops (Supplementary Fig. 9 and 10). Lastly, we report the Balassa Index<sup>14</sup> of Revealed Comparative Advantage (RCA) (Supplementary Fig. 11). RCA compares the export performance of a region in a certain crop with the global export performance for that crop. To exclude the impact of trade barriers on export performance, we calculate the index based on the trade pattern in the *Facilitation + Tariff elimination* scenario.

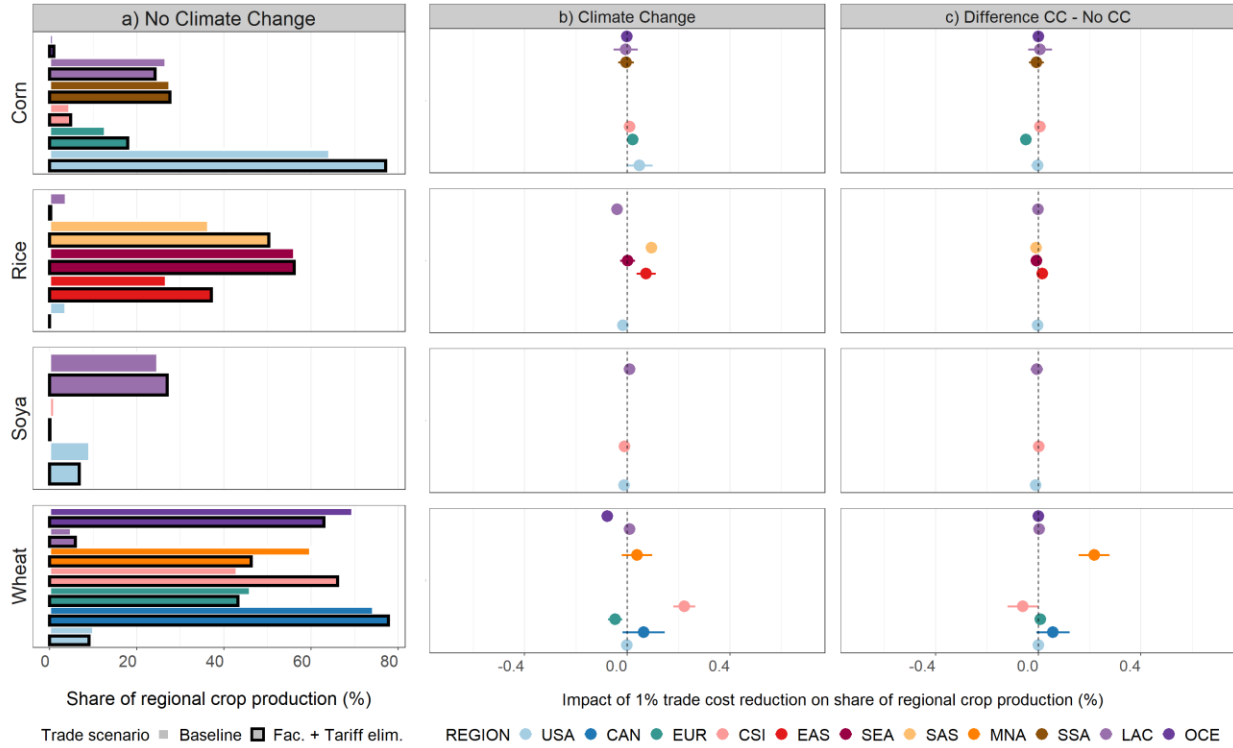

**Supplementary Fig. 6 | Intra-regional specialization in corn, rice, soya and wheat in response to trade cost reduction in 2050.** **a)** presents the share in total regional crop production under no climate change in *Baseline trade* and *Facilitation + Tariff Elimination*. In **b)** each point shows the estimated impact of a 1% reduction in trade costs for each region on share of regional crop production in percentage, with lines denoting the corresponding 95% confidence interval (heteroskedastic robust standard errors). Idem for **c)**, except that the outcome variable is the difference in share of regional crop production with the no climate change scenario. Regression models are described in Method.

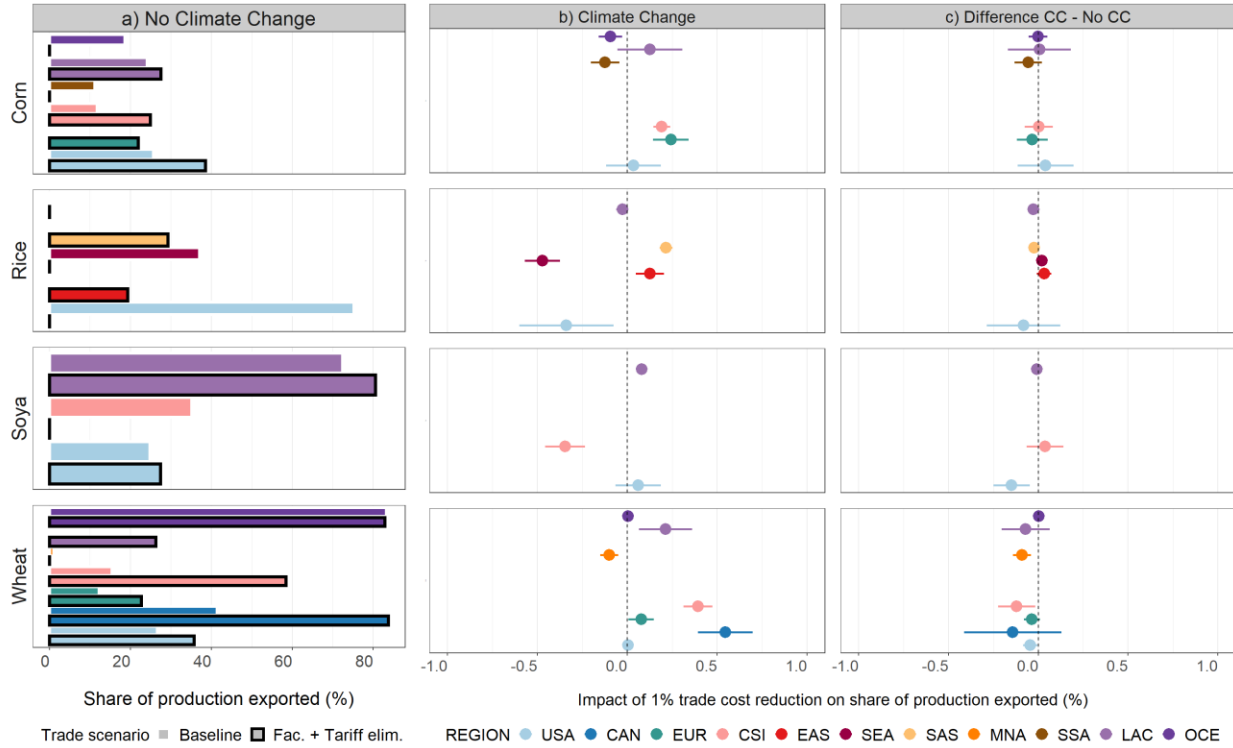

**Supplementary Fig. 7 | Export orientation of production in corn, rice, soya and wheat in response to trade cost reduction in 2050.** a) presents the share of production exported under no climate change in *Baseline trade* and *Facilitation + Tariff Elimination*. In b) each point shows the estimated impact of a 1% trade cost reduction for each region on share of production exported in percentage, with lines denoting the corresponding 95% confidence interval (heteroskedastic robust standard errors). Idem for c), except that the outcome variable is the difference in share of production exported compared to no climate change. Regression models are described in Method.

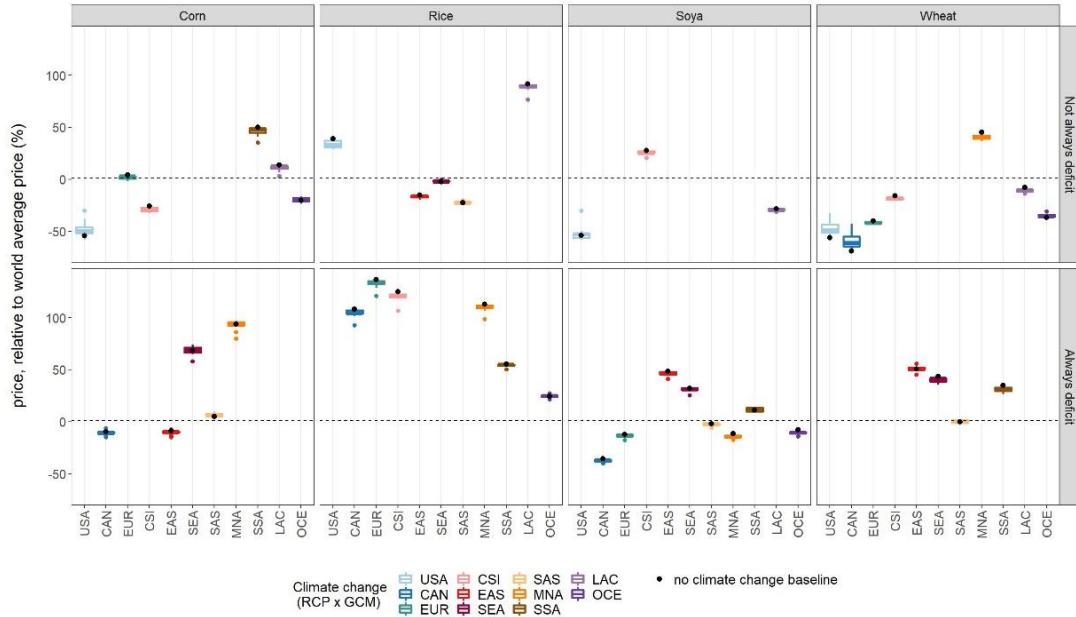

**Supplementary Fig. 8 | Relative competitiveness (across regions) in response to climate change in 2050 under *Baseline trade*.** The y axis indicates the producer price relative to the world average producer price for each crop, with values below zero indicating an above average competitiveness. Boxplots show the distribution of the relative producer price over the nine climate change scenarios (lower and upper hinges corresponding to 25<sup>th</sup> and 75<sup>th</sup> percentiles, whiskers reflecting values no further than 1.5\*IQR from the hinges, and points showing outliers). Distinction is made between regions that have a deficit production in at least 90% of trade and climate change scenario (*Always deficit*), and regions that do not (*Not always deficit*).

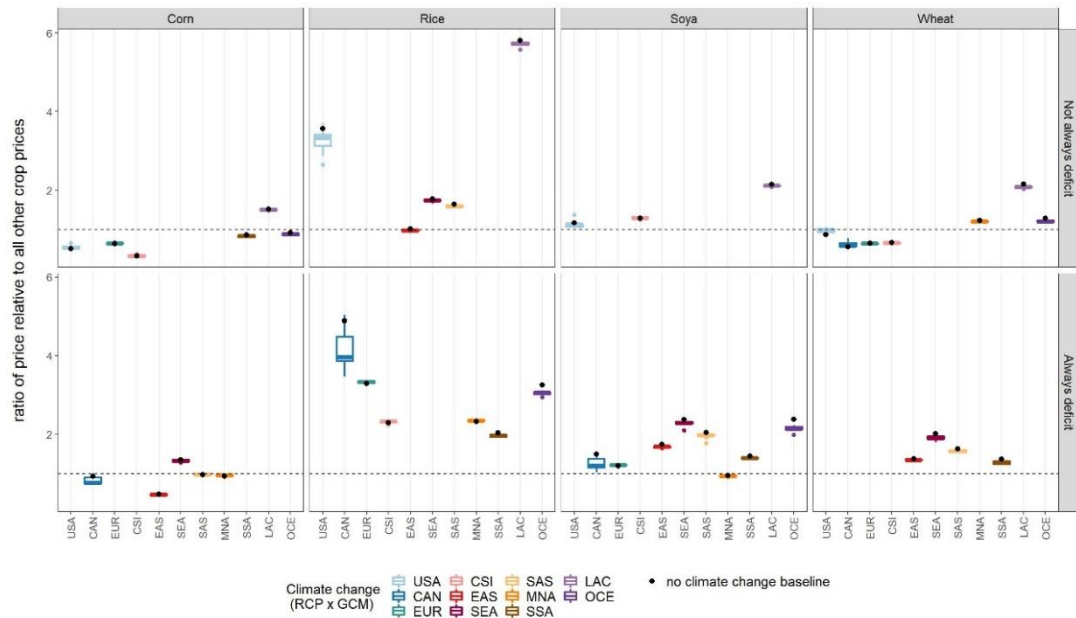

**Supplementary Fig. 9 | Relative competitiveness (across regions and crops) in response to climate change in 2050 under *Baseline trade*.** The y-axis indicates for each crop and region the ratio of the crop price to the average price of all other crops. A ratio below 1 (below the dotted line) indicates a high competitiveness compared to other crops. Boxplots show the distribution of the ratio under the nine climate change scenarios (lower and upper hinges corresponding to 25<sup>th</sup> and 75<sup>th</sup> percentiles, whiskers reflecting values no further than 1.5\*IQR from the hinge, and points outliers). Distinction is made between regions that have a deficit production in at least 90% of climate change and trade scenario (*Always deficit*), and regions who do not (*Not always deficit*).

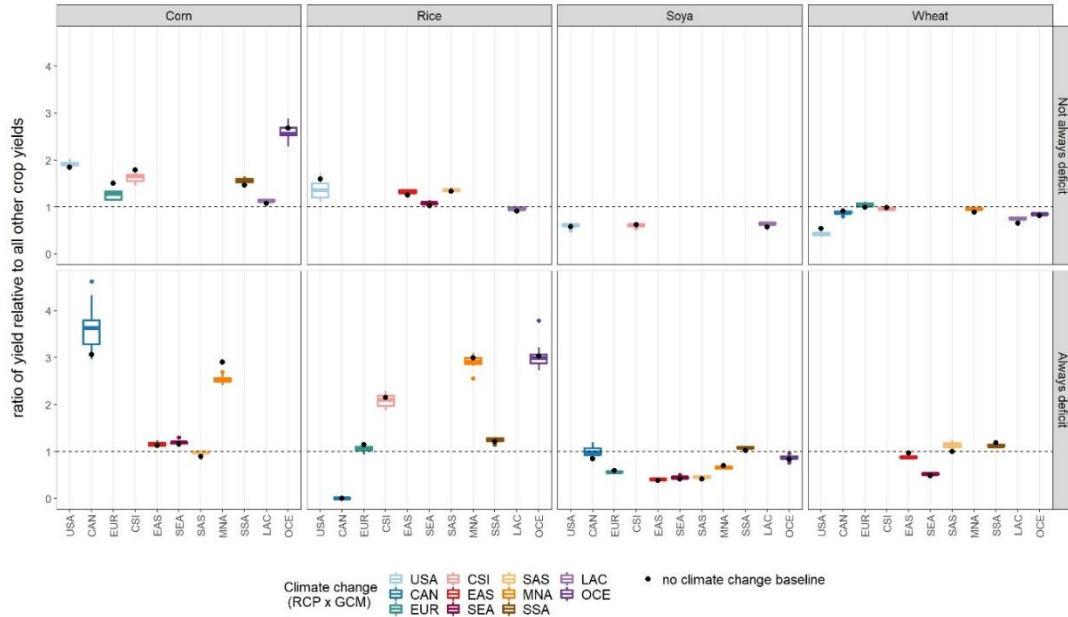

**Supplementary Fig. 10 | Relative yield of corn, rice, soya and wheat in response to climate change in 2050 under *Baseline trade*.** The y-axis indicates for each crop the ratio of yield to the average yield of all other crops. A ratio larger than 1 (above the dotted line) indicates a low opportunity cost in terms of land. Boxplots show the distribution under the nine climate change scenarios (lower and upper hinges corresponding to 25<sup>th</sup> and 75<sup>th</sup> percentiles, whiskers reflecting values no further than 1.5\*IQR from the hinge, and points outliers). Distinction is made between regions that have a deficit production in at least 90% of climate change and trade scenario (*Always deficit*), and regions who do not (*Not always deficit*).

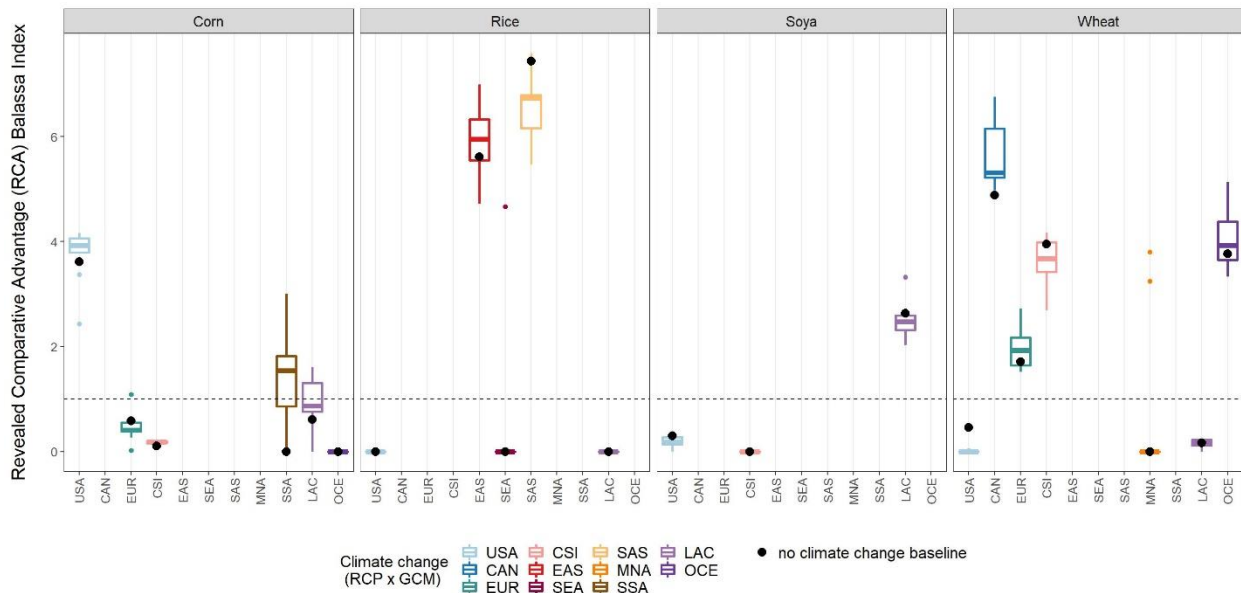

**Supplementary Fig. 11 | Impact of climate change on Revealed Comparative Advantage (RCA) Balassa Index in 2050 under *Facilitation + Tariff elimination*.** The y-axis indicates for each crop the share of a region's exports in a region's total crop export relative to the share of the global exports in global total crop exports<sup>14</sup>. A value above one indicates a revealed comparative advantage. Boxplots show the distribution under the nine climate change scenarios (lower and upper hinges corresponding to 25<sup>th</sup> and 75<sup>th</sup> percentiles, whiskers reflecting values no further than 1.5\*IQR from the hinge, and points outliers). Regions with deficit production in more than 10% of climate change and trade scenarios are excluded.

## CO<sub>2</sub> fertilization sensitivity analysis

Model intercomparison studies show that the representation of the CO<sub>2</sub> fertilization effect is one of the key factors causing uncertainty in crop yield projections under climate change<sup>15,16</sup>. The fertilization effect depends on nutrient and water availability, and is heterogeneous across crops and regions<sup>16–18</sup>. Compared to other crop models, EPIC is on the conservative side in terms of the positive impact of CO<sub>2</sub> fertilization<sup>15</sup>. To check the sensitivity of our results to the impact of CO<sub>2</sub> fertilization on crop yields, we ran the full spectrum of RCP scenarios (RCP2.6, RCP4.5, RCP6, RCP8.5) with and without CO<sub>2</sub> fertilization. For the full spectrum, we have, however, only crop projections available from EPIC for four crops (corn, soya, wheat and rice) based on HadGEM2-ES climate change projections. The limited availability of non-CO<sub>2</sub> sensitivity runs is related to priorities set in the ISIMIP Fast Track protocol (see Method). To model climate change shifts for all crops in GLOBIOM, we map the crop yield impacts from the four crops to the other crops in a similar way as the mapping used by Müller and Robertson<sup>19</sup> for DSSAT (Supplementary Table 14).

**Supplementary Table 14| Mapping of corn, wheat, rice and soya yield simulations from EPIC to all crops in GLOBIOM for the CO<sub>2</sub> sensitivity analysis (RCP2.6 – RCP8.5: with or without CO<sub>2</sub> fertilization)<sup>1</sup>.**

| GLOBIOM crop                                                                                                              | Mapping                                                                                                                                                                 |
|---------------------------------------------------------------------------------------------------------------------------|-------------------------------------------------------------------------------------------------------------------------------------------------------------------------|
| C <sub>3</sub> crops (cassava, groundnuts, rapeseed, sunflower, palm, chickpeas, cotton, potatoes, sweet potatoes, beans) | C <sub>3</sub> crops are represented by the average climate impact on the three C <sub>3</sub> crops that are directly simulated (wheat, rice and soybean) <sup>2</sup> |
| Corn                                                                                                                      | Corn yield is directly simulated                                                                                                                                        |
| Millet, sorghum                                                                                                           | Millet and sorghum are represented by modified corn yield simulations: only half of the negative effects are applied due to better drought tolerance                    |
| Rice                                                                                                                      | Rice yield is directly simulated                                                                                                                                        |
| Soybean                                                                                                                   | Soybean yield is directly simulated                                                                                                                                     |
| Sugarcane                                                                                                                 | Sugarcane yield is represented by corn yield simulations                                                                                                                |
| Wheat                                                                                                                     | Wheat yield is directly simulated                                                                                                                                       |
| Other grains (barley)                                                                                                     | Barley is represented by modified wheat yield simulations: only half of the negative effects are applied due to better drought tolerance                                |

<sup>1</sup>The sensitivity analysis to CO<sub>2</sub> fertilization is limited to crop impacts. For grassland, we use the EPIC yield shifters for each RCP including CO<sub>2</sub> fertilization. <sup>2</sup>We compute the average of wheat, rice and soybean impacts weighted by base year area x yield.

Supplementary Fig. 12 shows the average crop yield impacts under the different RCPs, with and without the effect of CO<sub>2</sub> fertilization. The simulated crop yield under each RCP is lower when CO<sub>2</sub> fertilization is not taken into account. Average crop yields in this scenario set are in most regions larger than the simulations in the paper (Supplementary Table 15). This is a consequence of the bias that is introduced by mapping the impacts of corn, wheat, soya and rice to the other crops compared to the scenario set in the paper where we use direct simulations from EPIC for all crops.

Supplementary Fig. 13 plots the global risk of hunger under the alternative set of climate change scenarios. In the *Baseline trade* scenario, the risk of hunger is always higher without than with CO<sub>2</sub> fertilization. The hunger projections under the scenarios that we miss in the main scenario set (RCP2.6 – RCP6 without CO<sub>2</sub>) lie between the lowest (RCP2.6 with CO<sub>2</sub>) and highest climate change impact (RCP8.5 without CO<sub>2</sub>). This

shows that we capture the full range of climate change impacts in our main scenario set. Note that the increase in risk of hunger under these climate change scenarios is lower than in the original runs (Fig. 1 in main text). This is related to the bias introduced by the mapping, as also reflected in the lower average crop yield impacts in the simulations based on the 4 priority crops (Supplementary Table 15). As in the original run, the risk of hunger in RCP4.5 is slightly higher than in RCP6. In 2050 the atmospheric concentration of CO<sub>2</sub> and likely range of global mean temperature increase are slightly higher under RCP4.5 than under RCP6, while by the end of the century the situation is reversed<sup>20,21</sup>. The effect of the trade scenarios is the same as in the original run: *Fixed imports* and *pre-Doha tariffs* increase hunger, while *Tariff elimination*, *Facilitation* and the combined scenario decrease hunger. Also the regional results from the main scenario set (Extended Data Fig. 7) are robust under the alternative set of climate change scenarios (Supplementary Fig. 14). SAS and SSA face the most severe hunger risks. SSA, EAS and MNA benefit the most from trade liberalization and facilitation in terms of hunger reduction, while in SEA and SAS tariff elimination has adverse impacts in some climate change scenarios.

We also analyze the relation between hunger, trade costs and crop yields based on the alternative set of climate change scenarios (Supplementary Table 16). The findings are similar to the results in main text (Table 1): reducing trade costs lowers the risk of hunger and lower crop yields increases the risk of hunger. When excluding regions that experience negative impacts in some trade scenarios (SAS, SEA), we find, however, no significant negative interaction effect. This could be related to the overall lower hunger impacts of the alternative climate change scenario set.

Lastly, to assess the sensitivity of our comparative advantage results to CO<sub>2</sub> fertilization, we cannot use the alternative set of climate change scenarios because comparative advantage is determined by relative crop yield impacts. The mapping used to extrapolate impacts from the 4 crops to other crops implies that crop impacts are by construction correlated and that an analysis of comparative advantage based on these simulations would thus be biased. We therefore use our original scenario set and compare our indicator of comparative advantage between RCP8.5 with and without CO<sub>2</sub> fertilization. Supplementary Fig. 15 illustrates that the changes in share of global production for each crop are similar in the RCP8.5 scenario with and without CO<sub>2</sub> fertilization. This suggests that the conclusion on the impact of climate change on the pattern of comparative advantage is not affected by the CO<sub>2</sub> fertilization effect.



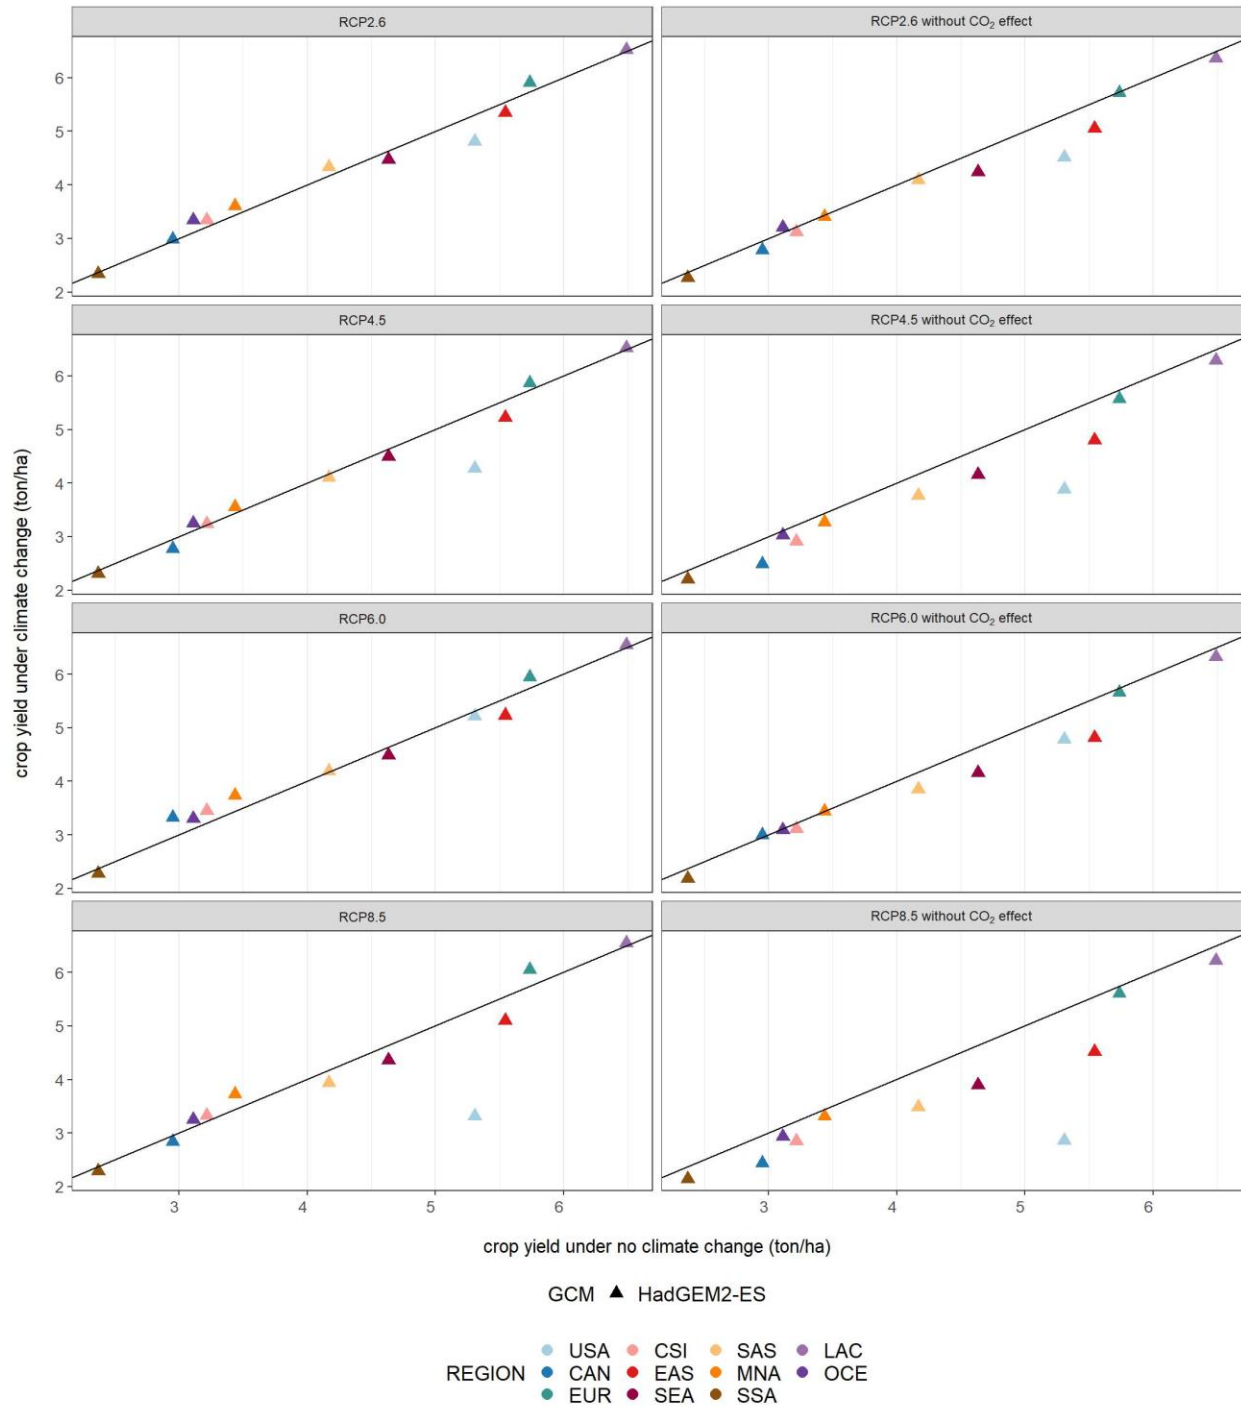

**Supplementary Fig. 12 | Biophysical impact of climate change on average crop yield in each region by 2050 as projected by the EPIC crop model.** Yields in ton dry matter per ha. The x-axis indicates the average crop yield under no climate change and y-axis the average crop yield under climate change for different RCPs with and without considering the CO<sub>2</sub> fertilization effect. Points above the black line indicate an increase in crop yield, points below a decrease in crop yield. Direct simulations for corn, wheat, rice and soya. Climate change impacts for the other crops are based on the mappings in Supplementary Table 14.

**Supplementary Table 15 | Comparison of average crop yield (dm ton/ha) in each region based on direct EPIC simulations on all crops (1) and EPIC simulations based on 4 major crops (2), with (wt) and without (wo) the effect of CO<sub>2</sub> fertilization. Climate projections from HadGEM2-ES.**

| Climate scenario          | CAN  |      | CSI  |      | EAS  |      | EUR  |      | LAC  |      | MNA  |      |
|---------------------------|------|------|------|------|------|------|------|------|------|------|------|------|
|                           | (1)  | (2)  | (1)  | (2)  | (1)  | (2)  | (1)  | (2)  | (2)  | (1)  | (1)  | (2)  |
| RCP2.6 wt CO <sub>2</sub> | 2.93 | 2.98 | 3.29 | 3.34 | 5.34 | 5.35 | 5.92 | 5.91 | 6.20 | 6.52 | 3.48 | 3.61 |
| RCP4.5 wt CO <sub>2</sub> | 2.71 | 2.77 | 3.24 | 3.24 | 5.20 | 5.23 | 5.88 | 5.86 | 6.12 | 6.52 | 3.42 | 3.56 |
| RCP6.0 wt CO <sub>2</sub> | 3.32 | 3.33 | 3.42 | 3.46 | 5.20 | 5.23 | 6.01 | 5.94 | 6.20 | 6.55 | 3.60 | 3.74 |
| RCP8.5 wt CO <sub>2</sub> | 2.80 | 2.84 | 3.29 | 3.33 | 5.06 | 5.10 | 6.09 | 6.05 | 6.02 | 6.55 | 3.56 | 3.73 |
| RCP8.5 wo CO <sub>2</sub> | 2.35 | 2.44 | 2.75 | 2.85 | 4.51 | 4.52 | 5.46 | 5.61 | 5.64 | 6.22 | 3.12 | 3.32 |

  

| Climate scenario          | OCE  |      | SAS  |      | SEA  |      | SSA  |      | USA  |      |
|---------------------------|------|------|------|------|------|------|------|------|------|------|
|                           | (1)  | (2)  | (1)  | (2)  | (1)  | (2)  | (1)  | (2)  | (1)  | (2)  |
| RCP2.6 wt CO <sub>2</sub> | 3.26 | 3.35 | 4.22 | 4.33 | 4.28 | 4.47 | 2.26 | 2.34 | 4.81 | 4.81 |
| RCP4.5 wt CO <sub>2</sub> | 3.15 | 3.25 | 3.90 | 4.11 | 4.28 | 4.50 | 2.19 | 2.31 | 4.28 | 4.27 |
| RCP6.0 wt CO <sub>2</sub> | 3.23 | 3.30 | 4.01 | 4.19 | 4.28 | 4.49 | 2.18 | 2.28 | 5.22 | 5.21 |
| RCP8.5 wt CO <sub>2</sub> | 3.13 | 3.26 | 3.68 | 3.94 | 4.08 | 4.36 | 2.15 | 2.29 | 3.31 | 3.31 |
| RCP8.5 wo CO <sub>2</sub> | 2.73 | 2.93 | 3.27 | 3.48 | 3.61 | 3.89 | 2.02 | 2.15 | 2.85 | 2.86 |

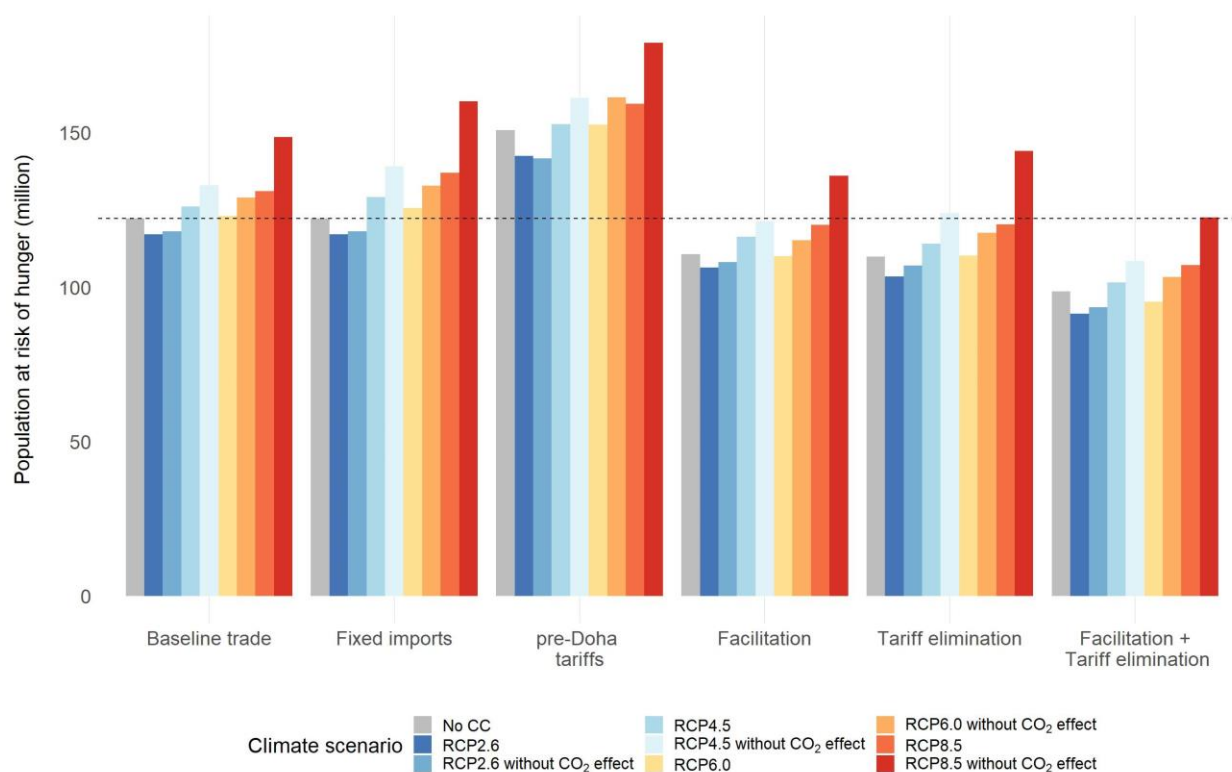

**Supplementary Fig. 13 | Global population at risk of hunger (million) in 2050 across RCPs from HadGEM2-ES and trade scenarios – impact of CO<sub>2</sub> fertilization.**

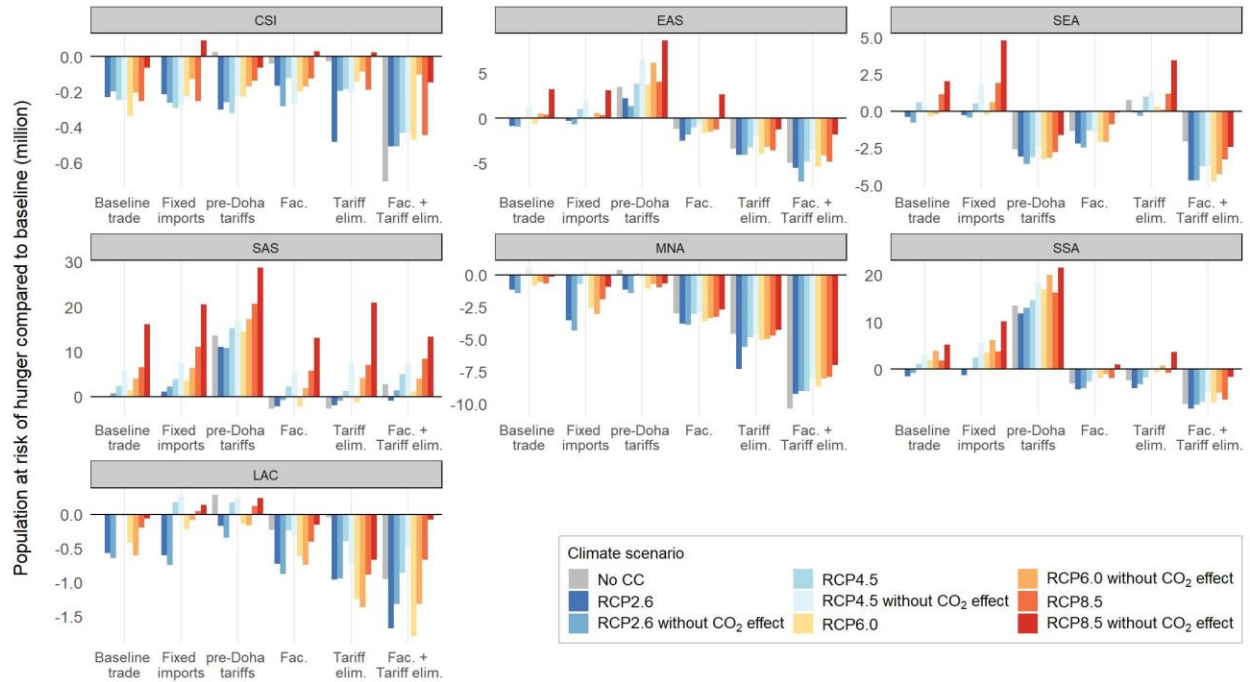

Supplementary Fig. 14 | Population at risk of hunger (million) in 2050 across RCPs from HadGEM2-ES and trade scenarios in hunger-affected regions – impact of CO<sub>2</sub> fertilization.

**Supplementary Table 16 | Results from OLS estimation of the impact of crop yields, trade costs and their interaction on population at risk of hunger and food availability.** Observations are GLOBIOM output for the 11 world regions under five different trade scenarios (Baseline, pre-Doha tariffs, Facilitation, Tariff elimination, and Facilitation + Tariff elimination) and the set of 9 alternative climate change scenarios in 2050 (No CC, RCP2.6 – RCP8.5: with and without CO<sub>2</sub> fertilization effect projected by EPIC & HadGEM2-ES).

|                                               | Population at risk of hunger (million) |                         | Food availability (kcal/cap/day) |                         |
|-----------------------------------------------|----------------------------------------|-------------------------|----------------------------------|-------------------------|
|                                               | (1) All regions                        | (2) without SAS and SEA | (1) All regions                  | (2) without SAS and SEA |
| Crop yield (% change)                         | -8.35 ***<br>(2.99)                    | -2.85<br>(2.22)         | 241.00 ***<br>(39.30)            | 210.00 ***<br>(43.40)   |
| Trade cost (log of US\$/10 <sup>6</sup> kcal) | 4.22 ***<br>(0.53)                     | 4.62 ***<br>(0.60)      | -42.90 ***<br>(6.56)             | -63.90 ***<br>(9.68)    |
| Crop yield x Trade cost                       | 0.01<br>(5.32)                         | -5.65<br>(4.17)         | 215.00 ***<br>(74.00)            | 271.00 ***<br>(85.60)   |

Significance levels: \*p<0.1; \*\*p<0.05; \*\*\*p<0.01. Regional fixed effects included. Heteroskedastic robust standard errors in brackets. N = 495 for (1) and 405 for (2). Adjusted R squared is 0.926 (1) and 0.948 (2) for hunger regressions and 0.955 (1) and 0.920 (2) for food availability regressions.

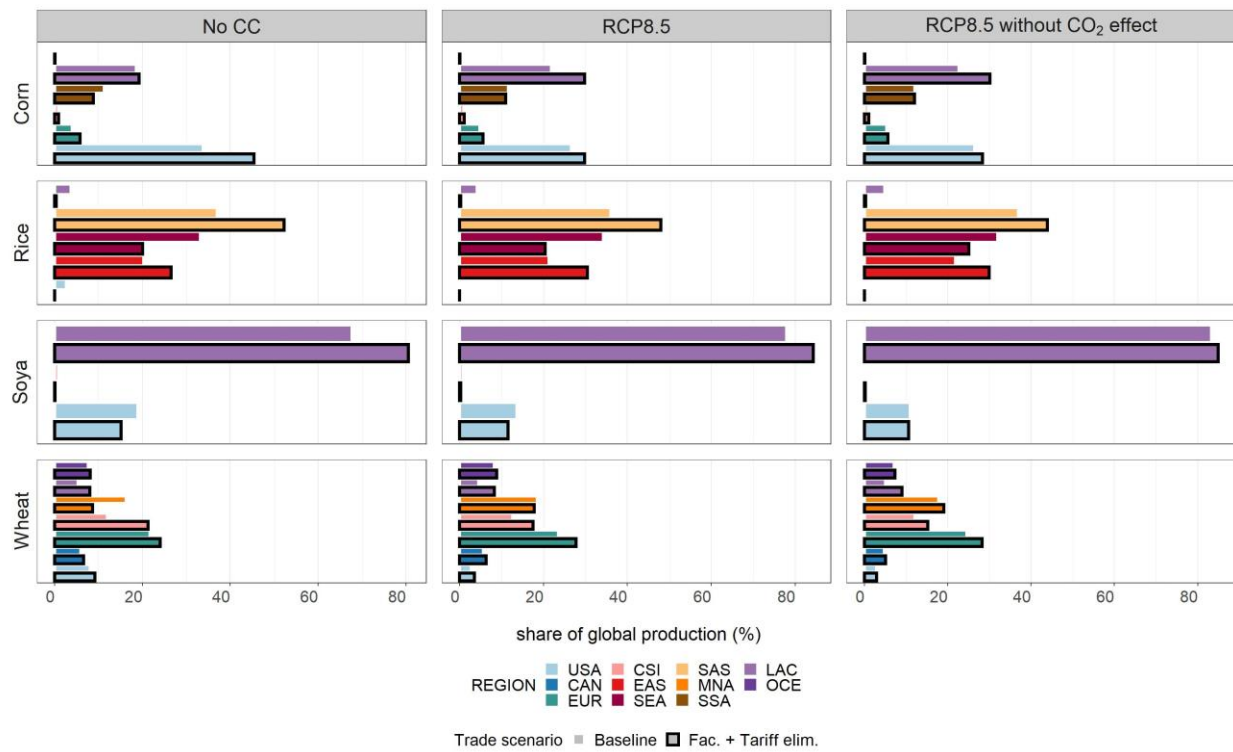

**Supplementary Fig. 15 | Impact of trade liberalization and trade facilitation on regions' share of global production of corn, rice, soya and wheat under no climate change (No CC), RCP8.5 with CO<sub>2</sub> fertilization and RCP8.5 without CO<sub>2</sub> fertilization.** Direct EPIC simulations on all crops based on climate change projections from HadGEM2-ES.

## Supplementary References

1. Bouët, A., Decreux, Y., Fontagné, L., Jean, S. & Laborde, D. Assessing applied protection across the world. *Rev. Int. Econ.* **16**, 850–863 (2008).
2. Guimbard, H., Jean, S., Mimouni, M. & Pichot, X. *MAcMap-HS6 2007, an exhaustive and consistent measure of applied protection in 2007*. (2012).
3. Wiebe, K. *et al.* Climate change impacts on agriculture in 2050 under a range of plausible socioeconomic and emissions scenarios. *Environ. Res. Lett.* **10**, (2015).
4. Baldos, U. L. C. & Hertel, T. W. The role of international trade in managing food security risks from climate change. *Food Secur.* **7**, 275–290 (2015).
5. Randhir, T. O. & Thomas, W. Trade Liberalization as a Vehicle for Adapting to Global Warming. *Agric. Resour. Econ. Rev.* **29**, 159–172 (2000).
6. Costinot, A., Donaldson, D. & Smith, C. Evolving Comparative Advantage and the Impact of Climate Change in Agricultural Markets: Evidence from 1.7 Million Fields around the World. *J. Polit. Econ.* **124**, 205–248 (2016).
7. Stevanović, M. *et al.* The impact of high-end climate change on agricultural welfare. *Sci. Adv.* 1–10 (2016).
8. Gouel, C. & Laborde, D. *The Crucial Role of International Trade in Adaptation to Climate Change*. (2018).
9. Cui, H. D., Kuiper, M., van Meijl, H. & Tabeau, A. *Climate change and global market integration: Implications for global economic activities, agricultural commodities, and food security. The State of Agricultural Commodity Markets (SOCO) 2018: Background paper*. (FAO, 2018).
10. Krugman, P. & Obstfeld, M. *International Economics Theory and Policy*. (1997).
11. Costinot, A., Donaldson, D. & Komunjer, I. What goods do countries trade? A quantitative exploration of Ricardo's ideas. *Rev. Econ. Stud.* **79**, 581–608 (2012).
12. Deardorff, A. V. Testing Trade Theories and Predicting Trade Flows. in *Handbook of International Economics, Volume 1* (eds. Jones, R. W. & Kenen, P.) 467–517 (1984).
13. Costinot, A. & Donaldson, D. Ricardo's Theory of Comparative Advantage: Old Idea, New Evidence. *Am. Econ. Rev. Pap. Proc.* **102**, 453–458 (2012).
14. Balassa, B. *Trade Liberalisation and Revealed Comparative Advantage*. (1965).
15. Rosenzweig, C. *et al.* Assessing agricultural risks of climate change in the 21st century in a global gridded crop model intercomparison. *Proc. Natl. Acad. Sci.* **111**, 3268–3273 (2014).

16. Moore, F. C., Baldos, U. L. C. & Hertel, T. Economic impacts of climate change on agriculture : a comparison of process-based and statistical yield models. *Environ. Res. Lett.* (2017).
17. McGrath, J. M. & Lobell, D. B. Regional disparities in the CO<sub>2</sub> fertilization effect and implications for crop yields. *Environ. Res. Lett.* **8**, (2013).
18. Terrer, C. *et al.* Nitrogen and phosphorus constrain the CO<sub>2</sub> fertilization of global plant biomass. *Nat. Clim. Chang.* **9**, 684–689 (2019).
19. Müller, C. & Robertson, R. Projecting future crop productivity for global economic modeling. *Agric. Econ.* **45**, 37–50 (2014).
20. IPCC. *Climate Change 2013: The Physical Science Basis. Contribution of Working Group I to the Fifth Assessment Report of the Intergovernmental Panel on Climate Change.* (Cambridge University Press, 2013).
21. Moss, R. H. *et al.* The next generation of scenarios for climate change research and assessment. *Nature* **463**, 747–756 (2010).
